# Supplementary material for: A prospective cohort study to investigate parental stress and child health in low-income Chinese families: protocol paper
Source: PubMed Central journal article supplement — BMJ Open. 2018 Feb 22;8(2):e018792. doi: 10.1136/bmjopen-2017-018792 (PMC5855257; doi:10.1136/bmjopen-2017-018792), 2018-02-22
Supplement: bmjopen-2017-018792.draft_revisions.pdf [file bmjopen-2017-018792.draft_revisions.pdf]

# BMJ Open

BMJ Open is committed to open peer review. As part of this commitment we make the peer review history of every article we publish publicly available.

When an article is published we post the peer reviewers' comments and the authors' responses online. We also post the versions of the paper that were used during peer review. These are the versions that the peer review comments apply to.

The versions of the paper that follow are the versions that were submitted during the peer review process. They are not the versions of record or the final published versions. They should not be cited or distributed as the published version of this manuscript.

BMJ Open is an open access journal and the full, final, typeset and author-corrected version of record of the manuscript is available on our site with no access controls, subscription charges or pay-per-view fees (<http://bmjopen.bmj.com>).

If you have any questions on BMJ Open's open peer review process please email [editorial.bmjopen@bmj.com](mailto:editorial.bmjopen@bmj.com)

# BMJ Open

## A prospective cohort study to investigate parental stress and child health in low-income Chinese families: protocol paper

|                               |                                                                                                                                                                                                                                                                                                                                                                                                                                                                                                                                                                                                                                                                                                                                                                                                                                                                                                                                                                                                                                                                                                                                                                                                                              |
|-------------------------------|------------------------------------------------------------------------------------------------------------------------------------------------------------------------------------------------------------------------------------------------------------------------------------------------------------------------------------------------------------------------------------------------------------------------------------------------------------------------------------------------------------------------------------------------------------------------------------------------------------------------------------------------------------------------------------------------------------------------------------------------------------------------------------------------------------------------------------------------------------------------------------------------------------------------------------------------------------------------------------------------------------------------------------------------------------------------------------------------------------------------------------------------------------------------------------------------------------------------------|
| Journal:                      | <i>BMJ Open</i>                                                                                                                                                                                                                                                                                                                                                                                                                                                                                                                                                                                                                                                                                                                                                                                                                                                                                                                                                                                                                                                                                                                                                                                                              |
| Manuscript ID                 | bmjopen-2017-018792                                                                                                                                                                                                                                                                                                                                                                                                                                                                                                                                                                                                                                                                                                                                                                                                                                                                                                                                                                                                                                                                                                                                                                                                          |
| Article Type:                 | Protocol                                                                                                                                                                                                                                                                                                                                                                                                                                                                                                                                                                                                                                                                                                                                                                                                                                                                                                                                                                                                                                                                                                                                                                                                                     |
| Date Submitted by the Author: | 21-Jul-2017                                                                                                                                                                                                                                                                                                                                                                                                                                                                                                                                                                                                                                                                                                                                                                                                                                                                                                                                                                                                                                                                                                                                                                                                                  |
| Complete List of Authors:     | <p>Wong, Rosa Sze Man; The University of Hong Kong, Department of Family Medicine and Primary Care</p> <p>Yu, Esther Yee Tak; The University of Hong Kong, Department of Family Medicine and Primary Care</p> <p>Guo, Vivian Yawei; The University of Hong Kong, Department of Family Medicine and Primary Care</p> <p>Wan, Eric; The University of Hong Kong, Department of Family Medicine and Primary Care</p> <p>Chin, Weng Yee; The University of Hong Kong, Department of Family Medicine and Primary Care</p> <p>Wong, Carlos; The University of Hong Kong, Department of Family Medicine and Primary Care</p> <p>Fung, Colman; The University of Hong Kong, Department of Family Medicine and Primary Care</p> <p>Tung, Keith Tsz-Suen; The University of Hong Kong, Department of Paediatrics and Adolescent Medicine</p> <p>Wong, HSW; The University of Hong Kong, Department of Paediatrics and Adolescent Medicine</p> <p>Ip, Patrick; The University of Hong Kong, Department of Paediatrics and Adolescent Medicine</p> <p>Tiwari, Agnes Fung Yee ; Hong Kong Sanatorium &amp; Hospital, School of Nursing</p> <p>Lam, Cindy; The University of Hong Kong, Department of Family Medicine and Primary Care</p> |
| Keywords:                     | Parental stress, Child health, Health-related quality of life, Bidirectional relationship, Low-income families                                                                                                                                                                                                                                                                                                                                                                                                                                                                                                                                                                                                                                                                                                                                                                                                                                                                                                                                                                                                                                                                                                               |
|                               |                                                                                                                                                                                                                                                                                                                                                                                                                                                                                                                                                                                                                                                                                                                                                                                                                                                                                                                                                                                                                                                                                                                                                                                                                              |

SCHOLARONE™  
Manuscripts

**Title**

A prospective cohort study to investigate parental stress and child health in low-income Chinese families: protocol paper

**Authors:**

Rosa Sze Man **Wong**<sup>1</sup>, Esther Yee Tak **Yu**<sup>\*1</sup>, Vivian Yawei **Guo**<sup>1</sup>, Eric Yuk-Fai **Wan**<sup>1</sup>,  
Weng-Yee **Chin**<sup>1</sup>, Carlos King Ho **Wong**<sup>1</sup>, Colman Siu Cheung **Fung**<sup>1</sup>, Keith Tsz Suen **Tung**<sup>2</sup>,  
Wilfred Hing-Sang **Wong**<sup>2</sup>, Patrick **Ip**<sup>2</sup>, Agnes Fung Yee **Tiwari**<sup>3</sup> and Cindy Lo Kuen **Lam**<sup>1</sup>

<sup>1</sup> Department of Family Medicine and Primary Care, The University of Hong Kong, Hong Kong

<sup>2</sup> Department of Paediatrics and Adolescent Medicine, The University of Hong Kong, Hong Kong

<sup>3</sup> School of Nursing, Hong Kong Sanatorium & Hospital, Hong Kong

**\*Corresponding author:**

Dr. Esther Yee Tak Yu

Department of Family Medicine and Primary Care,

The University of Hong Kong,

3/F, Ap Lei Chau Clinic, 161 Ap Lei Chau Main Street, Ap Lei Chau, Hong Kong

Tel. (852) 2518 5658

Fax. (852) 2814 7475

E-mail address: ytyu@hku.hk

## Abstract

### Introduction

Chronic stress has adverse effects on health. Adults and children from low-income families are subject to multiple sources of stress. To date, much of the research on the health effect from chronic stress among low-income families focused on either adults or children but there is limited knowledge on the interaction among stress, parental health and child health problems. This prospective cohort study aims to explore the bidirectional relationship between parental stress and health-related quality of life (HRQOL) and child health and behaviors in Chinese low income families.

### Methods and analysis

This prospective cohort study will sample 254 low-income parent-child pairs and follow them up for 24 months with assessments at 3 time points (baseline, 12-, and 24-months) on parental stress, HRQOL, and child health and behavior using both subjective measures and objective physiological parameters. This study will collect data using standardized measures on HRQOL and behaviors of children as well as HRQOL, mental health and stress levels of parents along with physiological tests of allostatic load and telomere length. The mediating or moderating effect of family harmony, parenting style and neighborhood conditions will also be assessed. Data will be analyzed by latent growth modeling and cross lagged path model to examine the relationship between changes in parental health and changes in child health. Mediation and moderation analysis will also be conducted to examine the mechanism by which the variables relate.

### Ethics and dissemination

This study was approved by the institutional review board of the University of Hong Kong – the Hospital Authority Hong Kong West Cluster, Reference number: UW 16-415. The study findings will be disseminated through peer-reviewed publications and international conferences.

**Trial registration number** ClinicalTrials.Gov: NCT03185273

**Strength and limitations of this study**

- This study will advance the knowledge on whether and how parental stress, mental health and HRQOL interact with child health and behavior over time among low-income families.
- Family harmony, parenting style and neighborhood cohesion will be assessed to determine their effect on parental and child health.
- Findings will promote a system approach in the health care policy and service provision for low-income families.
- Study participants will be recruited from a community family support programme, which reduces the generalizability of our findings to other populations.
- This study will use parent-proxy report of child HRQOL and behaviors which may cause response bias.

## Introduction

Poverty is inextricably related to ill health; both can be trans-generational.<sup>1</sup> Hong Kong, despite having a per-capita-gross-domestic-product (GDP) of HK\$273,550, has a high Gini coefficient of 0.537 reported in 2011; approximately 20% of the population are living in poverty as defined by a monthly household income below half of the Hong Kong median.<sup>2</sup> Therefore, health problems (mental or physical) resulting from poverty is a significant public health issue and their prevention is urgent.

### *Psychosocial effects of stress on adults and children*

Economic hardship has been associated with poorer social support and greater family tension,<sup>3</sup> predisposing individuals and families to mental health problems such as depression and anxiety. Poor mental health may disrupt parenting quality and interpersonal relationships among family members; family conflicts and maladaptive parenting practices may in turn place their children at an increased risk of poor health outcomes<sup>4 5</sup> and jeopardize the children's opportunity to receive adequate cognitive and psychosocial resources. Without adequate care and guidance from parents, children from low-income families are prone to develop weight problems and problem behaviors, such as truancy and disobedience. These childhood problems might also intensify symptoms of stress in parents. In our previous study, children from Chinese low-income families also experienced poorer health and more behavioral problems than other children in the population at similar age.<sup>6</sup>

### *Parental stress and its biological effects*

"Parental stress" refers to stress, defined as negative emotional experiences accompanied by predictable biochemical, physiological, cognitive, and behavioral changes directed either towards altering the stressful event or accommodating to its effects, which parents experience in general term.<sup>7</sup> Parental stress does not only result from child-rearing, but also from their social and environmental circumstances, responsibilities, and everyday life such as the presence or absence of social support, economic challenges and parenting responsibilities, which influences parents' well-being and mental health.<sup>8</sup> Under chronic stressful conditions, excessive strain on the body can cause cumulative damages to physiological systems (e.g. cardiovascular, metabolic, anthropometric, neuroendocrine and immune systems) which is often referred as allostatic load (AL).<sup>9</sup> Adults with high AL had been found to be more vulnerable to a number of physical, mental and behavioral disorders

1  
2  
3 such as cardiovascular disease, depression and aggression.<sup>10</sup>  
4  
5

### 6 *Biological effects of stress on child health*

7  
8 “Child health” is the extent to which individual children (or groups of children) are able  
9 or enabled to i) Develop and realize their potential, ii) Satisfy their needs, and iii) Develop  
10 the capacities that allow them to interact successfully with their biological, physical and  
11 social environments.<sup>11</sup> According to the 2007 United Nations International Children's  
12 Emergency Fund (UNICEF) report, child health can be described in six dimensions according  
13 to the: material well-being, health and safety, education, family and peer relationships,  
14 subjective well-being, behaviors and lifestyles.<sup>12</sup> Animal and human studies have shown that  
15 child health outcomes later in life were related to early caregiving experiences through  
16 physiological stress responses.<sup>13</sup> In children, some traditional AL markers cannot be easily  
17 measured because of difficulty in blood sampling. Telomeres are essential components that  
18 protect the ends of chromosomes and shorten each time a cell divides. As a biomarker of  
19 cellular and biologic aging, telomere shortening is associated with a number of adverse health  
20 outcomes in adulthood. Previous studies on telomere length in children focused on severe  
21 environmental adversities in early childhood such as living in institutions<sup>14</sup> and prenatal  
22 tobacco exposure,<sup>15</sup> and demonstrated that adverse living environment led to telomere  
23 shortening in exposed children. Children with family adversity had been found to have  
24 shorter telomeres and greater cortisol reactivity to stress,<sup>16 17</sup> which were associated with  
25 poorer health outcomes later in life.<sup>18</sup> At present, telomere length is regarded as a marker of  
26 stress exposure in children.<sup>18</sup> However, evidence on the long term impact of telomere  
27 shortening since early childhood on health in adulthood is not yet available and warrants  
28 further research.  
29  
30  
31  
32  
33  
34  
35  
36  
37  
38  
39  
40  
41  
42

### 43 *Relationship between parental stress and child health*

44  
45 Previous study confirmed that stressful experiences during maternal pregnancy and  
46 early postnatal period might manifest as biological changes in children,<sup>19</sup> which increased  
47 their vulnerability to health and behavioral problems later in life. A bidirectional relationship  
48 between parenting stress and child behaviors had also been documented in some studies, but  
49 these studies focused on stress resulting from parenting.<sup>4 5</sup> It remains unclear whether  
50 generalized stress in parents is related to child health in a bidirectional or unidirectional way.  
51  
52  
53  
54  
55

### 56 *Potential mediators and moderators*

1  
2  
3 Since not all children from low-income families develop problematic behaviors and/or  
4 emotions, there may be certain factors that can protect a child from the negative  
5 consequences of growing up in a low-income household.<sup>18</sup> It has been posited that economic  
6 disadvantage is a risk factor for exposure to trauma and violence.<sup>1</sup> Our previous study  
7 showed that maternal mental quality of life mediated the association between intimate partner  
8 abuse against mothers and their children's behaviors and quality of life.<sup>20</sup> Family disharmony  
9 and child maltreatment can therefore be potential intermediate variables contributing to the  
10 association of parental stress with child health particularly among low-income families. On  
11 the other hand, researches had found that an authoritative parenting style and neighborhood  
12 cohesion might have protective benefits on these children.<sup>16 21</sup>

13  
14  
15  
16  
17  
18  
19  
20  
21 This study aims to explore whether there is a bi-directional relationship between  
22 parental stress and child health, and to examine the mediators and moderators of the  
23 relationship between parental stress and child health. The study conceptual model is shown in  
24 Figure 1. We hypothesize that there is a bi-directional relationship between parental stress  
25 and child health. We further hypothesize that family disharmony and child maltreatment are  
26 intermediate variables contributing to the association of parental stress with child health  
27 particularly among low-income families, whereas authoritative parenting style and  
28 neighborhood cohesion has protective benefits on these children.

## 33 34 35 36 **Methods and analysis**

### 37 38 **Study aims**

- 39 ● To examine the relationship between parental stress and child health.
- 40 ● To evaluate the stress of parents as indicated by their subjective perception of mental  
41 health, quality of life and allostatic load on the body.
- 42 ● To evaluate the health of children as indicated by their well-being, behaviors, body  
43 mass index (BMI) z-score and telomere length.
- 44 ● To examine the correlation between changes in parental stress and changes in child  
45 health over time.
- 46 ● To identify the moderators and mediators of the relationship between parental stress  
47 and child health.

### 48 49 50 51 52 53 54 55 **Study design and setting**



1  
2  
3 This is a prospective cohort study building upon an existing cohort study (main cohort  
4 study) on the effectiveness of the Trekkers Family Enhancement Scheme funded by a  
5 philanthropic foundation in Hong Kong (Kerry Group Kuok Foundation (Hong Kong)  
6 Limited).<sup>22,23</sup> This study will recruit parent-child pairs from low-income families and follow  
7 them up for 24 months with regular assessment on parental stress and child health using both  
8 subjective measures and objective physiological parameters. Additional data on health-related  
9 quality of life (HRQOL), family harmony, parenting style, neighborhood cohesion, and  
10 parental risk of child physical assault and neglect and mental health will also be collected at  
11 each assessment time point for testing mediating and moderating mechanisms between  
12 parental stress and child health. The baseline assessment will be conducted in 2016-17 with  
13 follow-up assessments at 12 and 24 months.  
14  
15  
16  
17  
18  
19  
20  
21

## 22 **Ethics**

23  
24 The ethics of this study has been approved by the institutional review board of the  
25 University of Hong Kong – the Hospital Authority Hong Kong West Cluster, Reference  
26 number: UW 16-415.  
27  
28  
29

## 30 **Sample size calculations**

31  
32 To evaluate the association of factors with outcomes, several rules of thumb have been  
33 proposed for calculation of the required sample size based on the number of factors including  
34 (i)  $10 \times (\text{number of factors})$ , (ii)  $50 + \text{number of factors}$  and (iii)  $50 + 8 \times (\text{number of}$   
35  $\text{factors})$ .<sup>24-26</sup> A total of 16 factors including the potential confounders will be involved in the  
36 current study. A range from 66 to 178 subjects based on these three rules of thumb will be  
37 needed. A previous study showed that rule (iii) is better than rule (i) and (ii) at 80% power  
38 and 5% level of significance if an moderate effect size of 0.3 is assumed.<sup>26</sup> Therefore,  
39 considering an effect size of 0.3 and an attrition rate of 30%, a minimum sample size of 254  
40 parent-child pairs is needed to detect a moderate correlation between changes in parental  
41 stress and changes in child health over time at 80% power and 5% level of significance.  
42  
43  
44  
45  
46  
47  
48  
49

## 50 **Eligibility Criteria**

51 Participants are parent-child pairs from low-income families who satisfy the following  
52 inclusion criteria and without any exclusion criteria:  
53  
54

### 55 *Inclusion criteria:*

- 56 • Family monthly household income does not exceed 75% of Hong Kong's median  
57  
58  
59  
60

1  
2  
3 monthly household income; and

- 4 • At least one parent and one child aged 6 to 18 years of the same family have given  
5 consent to participate in the main cohort study.<sup>22 23</sup>  
6

7  
8 *Exclusion criteria:*

- 9 • Parents cannot speak or read Chinese;  
10  
11 • Children were born prematurely and/or with a congenital deformity; and  
12  
13 • Neither parent is the primary caregiver of the child.  
14  
15

16 **Recruitment**

17 We will approach eligible participants in the main cohort study by telephone or during  
18 face-to-face sessions. Information and consent for each parent-child pair will be obtained from  
19 those who express interest in study participation. After providing consent, the parent of each  
20 parent-child pair will complete a set of structured questionnaires on parental mental health  
21 and HRQOL, parenting style, neighborhood cohesion, and their children's well-being and  
22 behaviors. Physical examination on both the parent and child will include blood pressure,  
23 heart rate, weight, height, and waist-to-hip ratio. Each child will have a buccal cell swab and  
24 each adult will have a venous blood sample taken.  
25  
26  
27  
28  
29  
30  
31

32 **Assessment procedure**

33 This study will have three assessment waves: T1 Baseline, T2 follow up (12 months),  
34 and T3 follow up (24 months). Table 1 shows the measurement and time points at which data  
35 will be collected.  
36  
37

38 Physical health data and biological samples will be collected by research nurses and  
39 research assistants during health assessment sessions held in community centers.  
40 Questionnaire data will be collected by trained interviewers during a telephone survey. To  
41 minimize attrition, a package of questionnaires and a sheet of instructions and equipment (i.e.  
42 brushes) for swab-taking at home may also be sent to parents upon request. Parent-child pairs  
43 will be reimbursed HK\$50 (US\$6.4) for the baseline and HK\$100 (US\$12.8) for the  
44 12-month and 24-month assessments.  
45  
46  
47  
48  
49  
50  
51

52 **Maintenance Strategies**

53 This study will recruit participants from the main cohort study, which aims to evaluate  
54 the effectiveness of a Family Enhancement Scheme for a group of low-income families by  
55  
56  
57  
58  
59  
60

1  
2  
3 comparing the health outcomes of the intervention and control groups.<sup>23</sup> The intervention  
4 group has been enrolled in the Family Enhancement Scheme since 2012 and has agreed to  
5 take part in a 15-year project. These participants are engaged through regular contacts at  
6 various family enhancement interventions and are supportive of related research activities.  
7 Control families with similar socio-economical background have been recruited by our  
8 research team and have agreed to be followed up for at least 5 years. To improve retention,  
9 free health assessments and incentives will be offered at each data collection time point. This  
10 strategy serves to attract low-income families who only have limited access to preventive  
11 health services, as most of these services are currently only offered in the private healthcare  
12 sector in Hong Kong.  
13  
14  
15  
16  
17  
18  
19  
20

## 21 **Study instrument and measures**

### 22 Child health

23 Child Health Questionnaire – Parent Form 50 (CHQ-PF50) is a parent proxy measure of  
24 children’s physical and psychological wellbeing, with 50 items grouped into 12 multi-item  
25 subscales. Its Chinese version has been shown to have good psychometric properties in local  
26 Chinese children.<sup>22 27</sup>  
27  
28  
29  
30

31  
32 Strength and Difficulties Questionnaire (SDQ) is a 25-item parent-completed questionnaire  
33 measuring children’s behavioral issues. The SDQ, with 5 subscales, has been translated into  
34 traditional Chinese and tested with satisfactory reliability and validity in local children.<sup>22 28</sup>  
35  
36  
37

38  
39 Telomere length: DNA will be extracted from buccal epithelial cells. Telomere length will be  
40 measured by the method adapted from that originally published by Cawthon.<sup>29</sup> For each  
41 sample, the telomere length will be represented by the relative ratio of the telomere repeat  
42 copy number (T) to the single copy gene 36BA copy number (S). The T/S ratio will be  
43 determined by quantitative polymerase chain reaction (qPCR) using a 7900HT Thermocycler  
44 (Applied Biosystems). The quality of extracted DNA, as indicated by the value  
45 of A260/A280 ratio, will be determined by using the NanoDrop 2000c spectrophotometer  
46 (Thermo Scientific).  
47  
48  
49  
50  
51

52  
53 Body Mass Index (BMI) z-score: As BMI (calculated as  $\text{weight}/\text{height}^2$ ) changes rapidly in  
54 childhood, and growth patterns differ between boys and girls, BMI will be converted to  
55 z-score based on the international child growth reference.<sup>30</sup> This method allows for direct  
56  
57  
58  
59  
60

1  
2  
3 comparison of BMI and its changes across different ages and genders.  
4  
5

### 6 Parental health

7  
8 Mental health: Depression Anxiety Stress Scale (DASS) has 3 subscales, each with 7 items  
9 rating the severity/frequency of symptoms of stress, anxiety and depression respectively.  
10 DASS also has well-established psychometric properties<sup>31</sup> and been validated in Chinese  
11 population.<sup>32</sup> In addition, Patient Health Questionnaire – 9 (PHQ-9) will be used to screen for  
12 depression in parents. The Chinese version of PHQ-9 has been validated and used in previous  
13 local studies.<sup>22</sup>  
14  
15  
16  
17

18  
19 Quality of life: The SF-12 Health Survey-Version 2 (SF-12v2) is a 12-item quality of life  
20 assessment instrument that covers 8 subscales and 2 summary components. The Chinese  
21 version of SF-12v2 has been validated and normed in local Chinese population.<sup>33 34</sup>  
22  
23  
24

25  
26 Allostatic load index: A review of literature has identified a set of physiological parameters  
27 that can reflect AL and yet be conveniently measured, including blood pressure, heart rate,  
28 BMI, waist-to-hip ratio, lipid profile, fasting glucose and glycosylated haemoglobin.<sup>9</sup> An  
29 index score of AL is calculated by summing the number of parameters that fall into the  
30 “highest” risk quartile defined by local clinical practice guidelines.  
31  
32  
33  
34

35  
36 Screening for depression: Patient Health Questionnaire – 9 (PHQ – 9) is used to screen for  
37 depression in the parent. The Chinese version of PHQ-9 has been validated and used in  
38 previous local studies.<sup>22</sup>  
39  
40

### 41 Family and neighborhood environment

42  
43 Family environment: The Chinese version of Family Harmony Scale – 5 (FHS-5) will be  
44 used to measure family harmony.<sup>35</sup> Parental risk of physically abusing and neglecting  
45 children as well as their parenting style will also be assessed with the Child Physical Assault  
46 and Neglect subscale of the Parent Child Conflict Tactics Scale (CTSPC)<sup>36</sup> and the  
47 Authoritative Parenting Style subscale of the Parenting Style and Dimension Questionnaire  
48 (PSDQ),<sup>37</sup> respectively.  
49  
50  
51  
52  
53

54  
55 Neighborhood: The Chinese version of Neighborhood Collective Efficacy Scale (NCES) is a  
56 10-item scale, with five items each on informal social control and social cohesion.<sup>38</sup>  
57  
58  
59

Socio-demographic information that may be confounders will be collected, including household income, children's age and gender, and parental age and gender, education level, occupation, marital status, and immigration status. Parental history of smoking, drinking and illicit drug use as well as the comorbidities of parents and children will be recorded. The cognitive abilities of the child from each household were assessed by a clinical psychologist using the Wechsler Intelligence Scale for Children Fourth Edition – Hong Kong (Short Form) (WISC-IV-HK-SF) at the time of enrollment into the main cohort study. Data on such estimation of intelligence quotient (I.Q.) of the children will be retrieved and used as a confounder in the study.

### **Data processing and analysis**

Descriptive statistics will be used to summarize the characteristics of parents and children at baseline and each follow-up time point. Intention to treat (ITT) analysis will be used to handle missing data due to loss to follow-up. Various statistical techniques will be employed based upon research questions. Latent growth modelling will be conducted to obtain the trajectory of parental stress and child health over times. The bidirectional relationship between parental stress and child health over times will be determined using cross lagged path model.<sup>39</sup> Linear mixed effect model, including subjects as random effects, will be performed to evaluate the association between parental variables and between children's variables. Mediation and moderation analysis will also be conducted to examine the mechanism by which the variables relate. All analyses will control for a range of confounding factors with the following variables as outcomes/mediators/moderators:

#### *Primary outcomes*

- Child CHQ General Health Perceptions subscale score
- Parental DASS Stress subscale score

#### *Secondary outcomes*

- Child SDQ Total Difficulty score
- Child DNA telomere length
- Child BMI z-score
- Parental allostatic load index
- Parental SF-12vs HRQOL scores

#### *Mediators*

- Parental mental health: depression (PHQ-9 score), DASS Depression and Anxiety subscale score
- Family disharmony measured by FHS-5
- Child physical assault and neglect potential measured by the Physical Assault and Neglect subscale of the CTSPC

#### *Moderators*

- Authoritative parenting style measured by the Authoritative Parenting Style subscale of the PSDQ
- Neighbourhood cohesion measured by NCES

Potential confounders include parent age and gender, child age and gender, household income; parental occupation, marital status, smoking and drinking among family members, parental and child's comorbidities and child cognitive skills.

#### **Discussion**

Exposure to the constant stresses and dangers of poverty can have a detrimental impact on the health of parents and their children. It is important to mitigate the effect of poverty through protective mechanisms, the development of which should be guided by empirical evidence. Although it is known that poverty and poor health are linked with each other, the present research, with an aim to elucidate the relationship between parental stress and child health in low-income families, will give further insights into the possible cycle of ill health between parents and children, an aspect that is often overlooked. For example, the question of whether changes in parental stress correlate with changes in child health over time and its magnitude will be investigated. The result will inform various stakeholders of the potential for improvement through interventions on parental stress and child health.

In addition to the evaluation of subjective child general health reported by the parent, measurement of telomere length in children will provide evidence on the biological health of the children at cellular level. We will also measure child BMI z-score which is a recognized indicator of child health to reflect the growth of the children. The results could help to establish the robustness of assessing child general health using parent-proxy report and/or telomere length as a measure of child health for either clinical use or future research purposes. Moreover, allostatic load in the parent will also be studied in this research. It represents the sum of physiological dysregulations in the body of an individual in response to chronic

1  
2  
3 stressful situation prior to onset of medical illnesses, and is measured by a combination of  
4 biomarkers of health such as blood pressure and plasma glucose level. The total “stress load”  
5 is presented as a composite score, the allostatic load index, which predicts morbidity and  
6 mortality. These results will provide the public with evidence of the biological impact of  
7 stress perceived by the parents.  
8  
9

10  
11 Furthermore, this study will examine the mediators of the parent-child health  
12 relationship. The findings would inform healthcare providers and policy makers on the  
13 potential targets for intervention to improve both parent and child health (e.g. interventions  
14 for intimate partner abuse and family disharmony, or enhanced care for depression and  
15 anxiety). On the other hand, moderation analysis will focus on parenting style and  
16 neighbourhood cohesion. These two factors were selected because of their potentials for  
17 future interventions, e.g. parenting skill training and activities to promote neighbourhood  
18 cohesion, which deem feasible and may benefit the whole community. For policy makers, the  
19 results could be useful for informing the design of a holistic approach to address children’s  
20 health issues and parental stress. Ultimately, targeted interventions at risk factors identified  
21 by this study can be developed on the community level to improve the health of parents and  
22 children of low-income families.  
23  
24  
25  
26  
27  
28  
29  
30

### 31 **Ethics and dissemination**

32  
33 This study was approved by the institutional review board of the University of Hong Kong –  
34 the Hospital Authority Hong Kong West Cluster, Reference number: UW 16-415. The study  
35 findings will be disseminated through peer-reviewed publications and international  
36 conferences.  
37  
38  
39  
40  
41  
42  
43  
44  
45  
46  
47  
48  
49  
50  
51  
52  
53  
54  
55  
56  
57  
58  
59  
60

## References

1. Santiago CD, Kaltman S, Miranda J. Poverty and Mental Health: How Do Low-Income Adults and Children Fare in Psychotherapy? *Journal of Clinical Psychology* 2013;69(2):115-26.
2. The Government of the Hong Kong Special Administrative Region. Hong Kong Poverty Situation Report 2013. 2013:169.
3. Evans GW, Kim P. Childhood poverty, chronic stress, self-regulation, and coping. *Child Development Perspectives* 2013;7(1):43-48.
4. Neece CL, Green SA, Baker BL. Parenting stress and child behavior problems: A transactional relationship across time. *American Journal on Intellectual and Developmental Disabilities* 2012;117(1):48-66.
5. Stone LL, Mares SH, Otten R, et al. The Co-Development of Parenting Stress and Childhood Internalizing and Externalizing Problems. *Journal of Psychopathology and Behavioral Assessment* 2015:1-11.
6. Wong RSM, Guo VY, Ip P, et al. Mothers' health-related quality of life: its relationship with children's health-related quality of life and behavior in low income families. *Family Medicine and Community Health* 2016 4(4):4-12.
7. Cronin S, Becher E, Christians KS, et al. Parents and stress: Understanding experiences, context, and responses. 2015
8. Belsky J. The determinants of parenting: A process model. *Child development* 1984:83-96.
9. Juster R-P, McEwen BS, Lupien SJ. Allostatic load biomarkers of chronic stress and impact on health and cognition. *Neuroscience & Biobehavioral Reviews* 2010;35(1):2-16.
10. McEwen BS. Allostasis and allostatic load: implications for neuropsychopharmacology. *Neuropsychopharmacology* 2000;22(2):108-24.
11. National Research Council. Children's health, the Nation's wealth: assessing and improving child health. *National Academic Press* 2004
12. UNICEF. Child poverty in perspective: An overview of child well-being in rich countries. Innocenti Report Card 7. Florence, Italy: UNICEF Innocenti Research Centre, 2007.
13. Luecken LJ, Lemery KS. Early caregiving and physiological stress responses. *Clinical psychology review* 2004;24(2):171-91.
14. Drury SS, Theall K, Gleason MM, et al. Telomere length and early severe social deprivation: linking early adversity and cellular aging. *Molecular psychiatry* 2012;17(7):719-27.
15. Ip P, Chung BHY, Ho FKW, et al. Prenatal tobacco exposure shortens telomere length in children. *Nicotine & Tobacco Research* 2016:ntw139.
16. Asok A, Bernard K, Roth T, et al. Parental responsiveness moderates the association between early-life stress and reduced telomere length. *Development and psychopathology* 2013;25(03):577-85.



17. Gotlib I, LeMoult J, Colich N, et al. Telomere length and cortisol reactivity in children of depressed mothers. *Molecular psychiatry* 2015;20(5):615-20.
18. Theall KP, Brett ZH, Shirtcliff EA, et al. Neighborhood disorder and telomeres: Connecting children's exposure to community level stress and cellular response. *Social Science & Medicine* 2013;85:50-58.
19. Bowers ME, Yehuda R. Intergenerational Transmission of Stress in Humans. *Neuropsychopharmacology* 2016;41(1):232-44.
20. Guo VY, Yu EYT, Wong RSM, et al. Maternal mental quality of life mediates the associations between intimate partner abuse against mothers and their children's behaviours and quality of life in low-income Chinese families. *Quality of Life Research* 2017
21. Evans GW, Kim P, Ting AH, et al. Cumulative risk, maternal responsiveness, and allostatic load among young adolescents. *Developmental psychology* 2007;43(2):341.
22. Fung CSC, Yu EYT, Guo VY, et al. Development of a Health Empowerment Programme to improve the health of working poor families: protocol for a prospective cohort study in Hong Kong. *BMJ open* 2016;6(2):e010015.
23. Lam CLK, Guo VY, Wong CKH, et al. Poverty and health-related quality of life of people living in Hong Kong: comparison of individuals from low-income families and the general population. *J Public Health (Oxf)* 2017;39(2):258-65. doi: 10.1093/pubmed/fdw046
24. Cohen J. Statistical power analysis for the behavior science. *Lawrance Erlbaum Association* 1988
25. Harris RJ. A primer of multivariate statistics: Psychology Press 2001.
26. Green SB. How many subjects does it take to do a regression analysis. *Multivariate behavioral research* 1991;26(3):499-510.
27. Lee S, Cheung Y, Wong H, et al. Chronic health problems and health-related quality of life in Chinese children and adolescents: a population-based study in Hong Kong. *BMJ open* 2013;3(1):e001183.
28. Lai KY, Luk ES, Leung PW, et al. Validation of the Chinese version of the strengths and difficulties questionnaire in Hong Kong. *Social psychiatry and psychiatric epidemiology* 2010;45(12):1179-86.
29. Cawthon RM. Telomere measurement by quantitative PCR. *Nucleic acids research* 2002;30(10):e47-e47.
30. Dinsdale H, Ridler C, Ells L. A simple guide to classifying body mass index in children. *National Obesity Observatory, Oxford* 2011
31. Lovibond PF, Lovibond SH. The structure of negative emotional states: Comparison of the Depression Anxiety Stress Scales (DASS) with the Beck Depression and Anxiety Inventories. *Behaviour research and therapy* 1995;33(3):335-43.

- 1  
2  
3 32. Wang K, Shi H-S, Geng F-L, et al. Cross-cultural validation of the Depression Anxiety  
4 Stress Scale–21 in China. *Psychological assessment* 2016;28(5):e88.  
5  
6 33. Lam ET, Lam CL, Fong DY, et al. Is the SF-12 version 2 Health Survey a valid and equivalent  
7 substitute for the SF-36 version 2 Health Survey for the Chinese? *Journal of*  
8 *evaluation in clinical practice* 2013;19(1):200-08.  
9  
10 34. Lam C, Wong C, Lam E, et al. Population norm of Chinese (HK) SF-12 health  
11 survey-version 2 of Chinese adults in Hong Kong. *Hong Kong Practitioner*  
12 2010;32(2):77-86.  
13  
14 35. Kavikondala S, Stewart SM, Ni MY, et al. Structure and Validity of Family Harmony Scale:  
15 An Instrument for Measuring Harmony. *Psychological assessment* 2016;28(3):307.  
16  
17 36. Chan KL, Brownridge DA, Fong DY, et al. Violence against pregnant women can increase  
18 the risk of child abuse: a longitudinal study. *Child abuse & neglect* 2012;36(4):275-84.  
19  
20 37. Wu P, Robinson CC, Yang C, et al. Similarities and differences in mothers' parenting of  
21 preschoolers in China and the United States. *International Journal of Behavioral*  
22 *Development* 2002;26(6):481-91.  
23  
24 38. Chou K-L. Perceived discrimination and depression among new migrants to Hong Kong:  
25 The moderating role of social support and neighborhood collective efficacy. *Journal*  
26 *of affective disorders* 2012;138(1):63-70.  
27  
28 39. Stone LL, Mares SH, Otten R, et al. The Co-Development of Parenting Stress and  
29 Childhood Internalizing and Externalizing Problems. *Journal of Psychopathology and*  
30 *Behavioral Assessment* 2015;38(1):76-86.  
31  
32  
33  
34  
35  
36  
37  
38  
39  
40  
41  
42  
43  
44  
45  
46  
47  
48  
49  
50  
51  
52  
53  
54  
55  
56  
57  
58  
59  
60

## Acknowledgements

We are most grateful to Kerry Group Kuok Foundation (Hong Kong) Limited (KGKF) for their support. We thank the Neighborhood Advice-Action Council (NAAC) and Yat Tung (I/II) Estate Property Management in providing venue for our study. A special thanks to Versitech Ltd for granting us a complementary license to use the OPine Software for data collection in our study. The timely completion of the telephone surveys by the HKU Social Science Research Center is much appreciated. The hard work of our research staff in data collection and analysis must be acknowledged.

## Contributions

RSMW, EYTY and CLKL conceived the study concept, developed the funding proposal and applied for funding. RSMW, EYTY, VYG, CKHW, CSCF coordinates the project. EYFW and CKHW developed the statistical analysis plan. KTST and WHSW provided input regarding the telomere length assay and interpretation aspects of the study. WYC, PI, AFYT provided expert opinion in mental health, child development and family relationship aspects of the protocol respectively. CLKL is the funding holder of the community family support programme for low-income families in Hong Kong funded by a philanthropic foundation in Hong Kong (Kerry Group Kuok Foundation (Hong Kong) Limited). EYTY is the principal investigator and the grant holder of the Health and Medical Research Fund of Hong Kong (HMRF/14151571). RSMW, EYTY and CLKL initiated the writing of the protocol paper. All authors revised and approved the final version of the manuscript.

## Funding

This study was supported by Kerry Group Kuok Foundation (Hong Kong) Limited and the Health and Medical Research Fund of Hong Kong (HMRF/14151571).

### Competing interests

The authors declare no conflict of interest.

### Figure legend

**Figure 1.** Study conceptual model. Confounders include parent' age, gender, immigration status, occupation, marital status and history of smoking/drinking/drug use; child's age, gender and IQ; as well as monthly household income.

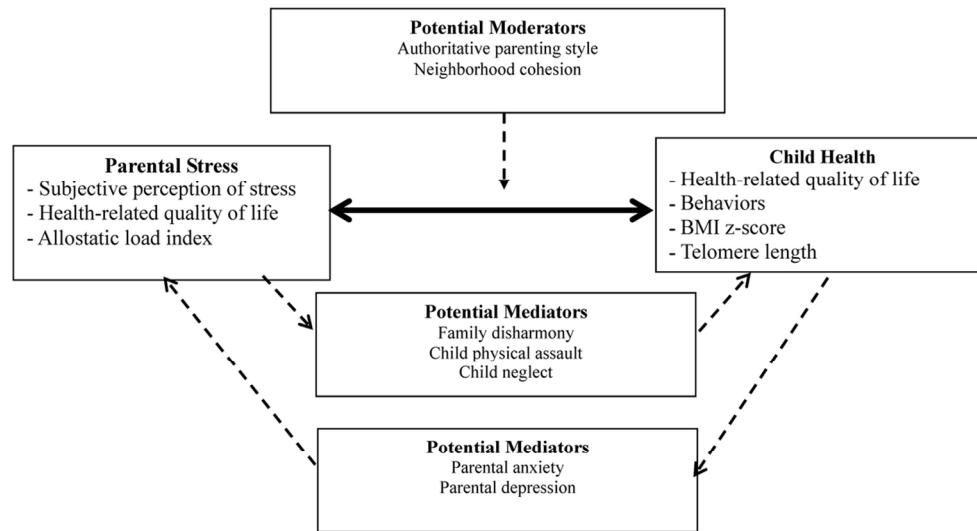

Figure 1. Study conceptual model. Confounders include parent' age, gender, immigration status, occupation, marital status and history of smoking/drinking/drug use; child's age, gender and IQ; as well as monthly household income.

108x58mm (300 x 300 DPI)

**STROBE 2007 (v4) Statement—Checklist of items that should be included in reports of *cohort studies***

| Section/Topic                | Item # | Recommendation                                                                                                                                                                       | Reported on page # |
|------------------------------|--------|--------------------------------------------------------------------------------------------------------------------------------------------------------------------------------------|--------------------|
| Title and abstract           | 1      | (a) Indicate the study's design with a commonly used term in the title or the abstract                                                                                               | 2                  |
|                              |        | (b) Provide in the abstract an informative and balanced summary of what was done and what was found                                                                                  | 2                  |
| <b>Introduction</b>          |        |                                                                                                                                                                                      |                    |
| Background/rationale         | 2      | Explain the scientific background and rationale for the investigation being reported                                                                                                 | 4-6                |
| Objectives                   | 3      | State specific objectives, including any prespecified hypotheses                                                                                                                     | 6                  |
| <b>Methods</b>               |        |                                                                                                                                                                                      |                    |
| Study design                 | 4      | Present key elements of study design early in the paper                                                                                                                              | 6                  |
| Setting                      | 5      | Describe the setting, locations, and relevant dates, including periods of recruitment, exposure, follow-up, and data collection                                                      | 7                  |
| Participants                 | 6      | (a) Give the eligibility criteria, and the sources and methods of selection of participants. Describe methods of follow-up                                                           | 7-8                |
|                              |        | (b) For matched studies, give matching criteria and number of exposed and unexposed                                                                                                  | NA                 |
| Variables                    | 7      | Clearly define all outcomes, exposures, predictors, potential confounders, and effect modifiers. Give diagnostic criteria, if applicable                                             | 11-12              |
| Data sources/<br>measurement | 8*     | For each variable of interest, give sources of data and details of methods of assessment (measurement). Describe comparability of assessment methods if there is more than one group | 9-11               |
| Bias                         | 9      | Describe any efforts to address potential sources of bias                                                                                                                            | 11-13              |
| Study size                   | 10     | Explain how the study size was arrived at                                                                                                                                            | 7                  |
| Quantitative variables       | 11     | Explain how quantitative variables were handled in the analyses. If applicable, describe which groupings were chosen and why                                                         | 11-12              |
| Statistical methods          | 12     | (a) Describe all statistical methods, including those used to control for confounding                                                                                                | 11-12              |
|                              |        | (b) Describe any methods used to examine subgroups and interactions                                                                                                                  | 11-12              |
|                              |        | (c) Explain how missing data were addressed                                                                                                                                          | NA                 |
|                              |        | (d) If applicable, explain how loss to follow-up was addressed                                                                                                                       | 11-12              |
|                              |        | (e) Describe any sensitivity analyses                                                                                                                                                | NA                 |
| <b>Results</b>               |        |                                                                                                                                                                                      |                    |

|                          |     |                                                                                                                                                                                                              |       |
|--------------------------|-----|--------------------------------------------------------------------------------------------------------------------------------------------------------------------------------------------------------------|-------|
| Participants             | 13* | (a) Report numbers of individuals at each stage of study—eg numbers potentially eligible, examined for eligibility, confirmed eligible, included in the study, completing follow-up, and analysed            | NA    |
|                          |     | (b) Give reasons for non-participation at each stage                                                                                                                                                         | NA    |
|                          |     | (c) Consider use of a flow diagram                                                                                                                                                                           | NA    |
| Descriptive data         | 14* | (a) Give characteristics of study participants (eg demographic, clinical, social) and information on exposures and potential confounders                                                                     | NA    |
|                          |     | (b) Indicate number of participants with missing data for each variable of interest                                                                                                                          | NA    |
|                          |     | (c) Summarise follow-up time (eg, average and total amount)                                                                                                                                                  | NA    |
| Outcome data             | 15* | Report numbers of outcome events or summary measures over time                                                                                                                                               | NA    |
| Main results             | 16  | (a) Give unadjusted estimates and, if applicable, confounder-adjusted estimates and their precision (eg, 95% confidence interval). Make clear which confounders were adjusted for and why they were included | NA    |
|                          |     | (b) Report category boundaries when continuous variables were categorized                                                                                                                                    | NA    |
|                          |     | (c) If relevant, consider translating estimates of relative risk into absolute risk for a meaningful time period                                                                                             | NA    |
| Other analyses           | 17  | Report other analyses done—eg analyses of subgroups and interactions, and sensitivity analyses                                                                                                               | 11-12 |
| <b>Discussion</b>        |     |                                                                                                                                                                                                              |       |
| Key results              | 18  | Summarise key results with reference to study objectives                                                                                                                                                     | 12-13 |
| <b>Limitations</b>       |     |                                                                                                                                                                                                              |       |
| Interpretation           | 20  | Give a cautious overall interpretation of results considering objectives, limitations, multiplicity of analyses, results from similar studies, and other relevant evidence                                   | 12-13 |
| Generalisability         | 21  | Discuss the generalisability (external validity) of the study results                                                                                                                                        | 12-13 |
| <b>Other information</b> |     |                                                                                                                                                                                                              |       |
| Funding                  | 22  | Give the source of funding and the role of the funders for the present study and, if applicable, for the original study on which the present article is based                                                | 17    |

\*Give information separately for cases and controls in case-control studies and, if applicable, for exposed and unexposed groups in cohort and cross-sectional studies.

**Note:** An Explanation and Elaboration article discusses each checklist item and gives methodological background and published examples of transparent reporting. The STROBE checklist is best used in conjunction with this article (freely available on the Web sites of PLoS Medicine at <http://www.plosmedicine.org/>, Annals of Internal Medicine at <http://www.annals.org/>, and Epidemiology at <http://www.epidem.com/>). Information on the STROBE Initiative is available at [www.strobe-statement.org](http://www.strobe-statement.org).

# BMJ Open

## A prospective cohort study to investigate parental stress and child health in low-income Chinese families: protocol paper

|                                 |                                                                                                                                                                                                                                                                                                                                                                                                                                                                                                                                                                                                                                                                                                                                                                                                                                                                                                                                                                                                                                                                                                                                                                       |
|---------------------------------|-----------------------------------------------------------------------------------------------------------------------------------------------------------------------------------------------------------------------------------------------------------------------------------------------------------------------------------------------------------------------------------------------------------------------------------------------------------------------------------------------------------------------------------------------------------------------------------------------------------------------------------------------------------------------------------------------------------------------------------------------------------------------------------------------------------------------------------------------------------------------------------------------------------------------------------------------------------------------------------------------------------------------------------------------------------------------------------------------------------------------------------------------------------------------|
| Journal:                        | <i>BMJ Open</i>                                                                                                                                                                                                                                                                                                                                                                                                                                                                                                                                                                                                                                                                                                                                                                                                                                                                                                                                                                                                                                                                                                                                                       |
| Manuscript ID                   | bmjopen-2017-018792.R1                                                                                                                                                                                                                                                                                                                                                                                                                                                                                                                                                                                                                                                                                                                                                                                                                                                                                                                                                                                                                                                                                                                                                |
| Article Type:                   | Protocol                                                                                                                                                                                                                                                                                                                                                                                                                                                                                                                                                                                                                                                                                                                                                                                                                                                                                                                                                                                                                                                                                                                                                              |
| Date Submitted by the Author:   | 09-Nov-2017                                                                                                                                                                                                                                                                                                                                                                                                                                                                                                                                                                                                                                                                                                                                                                                                                                                                                                                                                                                                                                                                                                                                                           |
| Complete List of Authors:       | Wong, Rosa Sze Man; The University of Hong Kong, Department of Family Medicine and Primary Care<br>Yu, Esther Yee Tak; The University of Hong Kong, Department of Family Medicine and Primary Care<br>Guo, Vivian Yawei; The University of Hong Kong, Department of Family Medicine and Primary Care<br>Wan, Eric; The University of Hong Kong, Department of Family Medicine and Primary Care<br>Chin, Weng Yee; The University of Hong Kong, Department of Family Medicine and Primary Care<br>Wong, Carlos; The University of Hong Kong, Department of Family Medicine and Primary Care<br>Fung, Colman; The University of Hong Kong, Department of Family Medicine and Primary Care<br>Tung, Keith Tsz-Suen; The University of Hong Kong, Department of Paediatrics and Adolescent Medicine<br>Wong, HSW; The University of Hong Kong, Department of Paediatrics and Adolescent Medicine<br>Ip, Patrick; The University of Hong Kong, Department of Paediatrics and Adolescent Medicine<br>Tiwari, Agnes Fung Yee ; Hong Kong Sanatorium & Hospital, School of Nursing<br>Lam, Cindy; The University of Hong Kong, Department of Family Medicine and Primary Care |
| <b>Primary Subject Heading</b>: | Mental health                                                                                                                                                                                                                                                                                                                                                                                                                                                                                                                                                                                                                                                                                                                                                                                                                                                                                                                                                                                                                                                                                                                                                         |
| Secondary Subject Heading:      | Epidemiology, General practice / Family practice, Health services research, Paediatrics                                                                                                                                                                                                                                                                                                                                                                                                                                                                                                                                                                                                                                                                                                                                                                                                                                                                                                                                                                                                                                                                               |
| Keywords:                       | Parental stress, Child health, Health-related quality of life, Bidirectional relationship, Low-income families                                                                                                                                                                                                                                                                                                                                                                                                                                                                                                                                                                                                                                                                                                                                                                                                                                                                                                                                                                                                                                                        |
|                                 |                                                                                                                                                                                                                                                                                                                                                                                                                                                                                                                                                                                                                                                                                                                                                                                                                                                                                                                                                                                                                                                                                                                                                                       |

SCHOLARONE™  
Manuscripts



1  
2  
3  
4  
5  
6  
7  
8  
9  
10  
11  
12  
13  
14  
15  
16  
17  
18  
19  
20  
21  
22  
23  
24  
25  
26  
27  
28  
29  
30  
31  
32  
33  
34  
35  
36  
37  
38  
39  
40  
41  
42  
43  
44  
45  
46  
47  
48  
49  
50  
51  
52  
53  
54  
55  
56  
57  
58  
59  
60

For peer review only

**Title**

A prospective cohort study to investigate parental stress and child health in low-income Chinese families: protocol paper

**Authors:**

Rosa Sze Man **Wong**<sup>1</sup>, Esther Yee Tak **Yu**\*<sup>1</sup>, Vivian Yawei **Guo**<sup>1</sup>, Eric Yuk-Fai **Wan**<sup>1</sup>,  
Weng-Yee **Chin**<sup>1</sup>, Carlos King Ho **Wong**<sup>1</sup>, Colman Siu Cheung **Fung**<sup>1</sup>, Keith Tsz Suen **Tung**<sup>2</sup>,  
Wilfred Hing-Sang **Wong**<sup>2</sup>, Patrick **Ip**<sup>2</sup>, Agnes Fung Yee **Tiwari**<sup>3</sup> and Cindy Lo Kuen **Lam**<sup>1</sup>

<sup>1</sup> Department of Family Medicine and Primary Care, The University of Hong Kong, Hong Kong

<sup>2</sup> Department of Paediatrics and Adolescent Medicine, The University of Hong Kong, Hong Kong

<sup>3</sup> School of Nursing, Hong Kong Sanatorium & Hospital, Hong Kong

**\*Corresponding author:**

Dr. Esther Yee Tak Yu

Department of Family Medicine and Primary Care,

The University of Hong Kong,

3/F, Ap Lei Chau Clinic, 161 Ap Lei Chau Main Street, Ap Lei Chau, Hong Kong

Tel. (852) 2518 5658

Fax. (852) 2814 7475

E-mail address: [ytyu@hku.hk](mailto:ytyu@hku.hk)

## Abstract

### Introduction

Chronic stress has adverse effects on health. Adults and children from low-income families are subject to multiple sources of stress. Existing literature about economic hardship mostly focus on either adults or children but not both. Moreover, there is limited knowledge on the relationship between parental generalized stress and child health problems. This study aims to explore the bidirectional relationship between parental stress and child health in Chinese low-income families and to identify other modifiable factors influencing this relationship.

### Methods and analysis

This prospective cohort study will sample 254 low-income parent-child pairs and follow them up for 24 months with assessments at 3 time points (baseline, 12-, and 24-months) on parental stress, health-related quality of life (HRQOL), and child health and behavior using both subjective measures and objective physiological parameters. This study will collect data using standardized measures on HRQOL and behaviors of children as well as HRQOL, mental health and stress levels of parents along with physiological tests of allostatic load and telomere length. The mediating or moderating effect of family harmony, parenting style and neighborhood conditions will also be assessed. Data will be analyzed using latent growth modeling and cross-lagged path analysis modelling to examine the bidirectional effect of parental stress and child health over time. Mediation and moderation analysis will also be conducted to examine the mechanism by which the variables relate.

### Ethics and dissemination

This study was approved by the institutional review board of the University of Hong Kong – the Hospital Authority Hong Kong West Cluster, Reference number: UW 16-415. The study findings will be disseminated through peer-reviewed publications and international conferences.

**Trial registration number** ClinicalTrials.Gov: NCT03185273

**Strength and limitations of this study**

- This is a longitudinal study which allows for cause-effect relationships testing.
- The use of objective physiological parameters of children and parents will increase the reliability of the findings.
- This study will have only three measurement time points (baseline, 12- and 24-months).
- This study will use parent-proxy report of child health which may cause response bias.
- Study participants will be recruited from a community family support programme, which reduces the generalizability of our findings to other populations.

## Introduction

Poverty is inextricably related to ill health; both can be trans-generational.<sup>1</sup> Dealing with economic hardship can cause substantial stress and negatively affect health. The Americans' Changing Lives Study which involved 3,617 participants found that higher levels of parental stress were related to poorer self-rated health in parents.<sup>2</sup> Moreover, economic stress is a known risk factor for child maltreatment and family violence, both of which are increasing globally.<sup>3</sup> These early adverse events are detrimental to children's health and development. Recent research conducted in mainland China found that obesity prevalence was higher among children in wealthier families<sup>4</sup>, but the patterns were different in Hong Kong with higher rates of childhood obesity among lower income families.<sup>4,5</sup> Hong Kong, despite having a per-capita-gross-domestic-product (GDP) of HK\$273,550, has large income differences between rich and poor as reflected by a high Gini coefficient of 0.539 reported in 2016; approximately 20% of the population are living in poverty as defined by a monthly household income below half of the Hong Kong median.<sup>6</sup> It is widely accepted that population health tend to be worse in societies with greater income inequalities, and hence low-income families in these societies are particularly at risk of health problems.<sup>7</sup> In our previous study, children from Hong Kong Chinese low-income families experienced poorer health and more behavioral problems than other children in the population at similar age.<sup>8</sup> Adults from these families also reported poorer health-related quality of life (HRQOL),<sup>9</sup> with 6.1% of the parents having a known history of mental illness and 18.2% of them reporting elevated level of stress. Therefore, health problems (mental or physical) resulting from poverty is a significant public health issue and their prevention is urgent.

### *Psychosocial effects of stress on adults and children*

According to the Family Stress Model, parental stress impacts children's lives through disruptions in parenting skills and family relationships. The process starts from economic disadvantages causing pressure and stress which exacerbate family conflicts and increase poor parenting practices, ultimately leading to health and adjustment problems in children.<sup>10</sup> Moreover, economic hardship has been associated with poorer social support and greater family tension,<sup>11</sup> which are known risk factors for mental health problems such as depression and anxiety. The resulting impairment in mental health not only disrupts interpersonal relationships among family members but also has negative impact on parenting. Family conflicts and aggressive and neglectful parenting practices are particularly harmful to

1  
2  
3 children's behavioral development, as conflicts and aggressive parenting behaviors can be  
4 observed and learned by their children. Children growing up in such aggressive families may  
5 believe that family aggression is acceptable and thus become more likely to behave in  
6 aggressive or harmful ways toward others.<sup>12 13</sup> On the other hand, neglectful parents tend to  
7 show minimal physical affection toward their children, know little about child development  
8 and have incompetent caretaking skills<sup>14</sup> which can put their children at a higher risk for  
9 obesity and other diseases. These childhood problems might in turn intensify feeling of  
10 distress in parents. The pathway linking children's problems to parental stress has been  
11 underexplored and thus warrants further investigations. Furthermore, despite growing  
12 empirical support for the Family Stress Model, such model is not static and more empirical  
13 evaluations are needed to identify risk and protective factors for changing the family stress  
14 process.<sup>15</sup>

#### 24 *Parental stress and its biological effects*

25 "Parental stress" refers to stress, defined as negative emotional experiences  
26 accompanied by predictable biochemical, physiological, cognitive, and behavioral changes  
27 directed either towards altering the stressful event or accommodating to its effects, which  
28 parents experience in general term.<sup>16</sup> Parental stress does not only result from child-rearing,  
29 but also from their social and environmental circumstances, responsibilities, and everyday  
30 life such as insufficient social support, economic challenges and heavy parenting  
31 responsibilities.<sup>17</sup> Under chronic stressful conditions, excessive strain on the body can cause  
32 cumulative damages to physiological systems (e.g. cardiovascular, metabolic, anthropometric,  
33 neuroendocrine and immune systems) which is often referred as allostatic load (AL).<sup>18</sup> Adults  
34 with high AL had been found to be more vulnerable to a number of physical, mental and  
35 behavioral disorders such as cardiovascular disease, depression and aggression.<sup>19</sup>

#### 45 *Biological effects of stress on child health*

46 According to the 2007 United Nations International Children's Emergency Fund  
47 (UNICEF) report, child health is a multidimensional construct that involves material  
48 well-being, health and safety, education, family and peer relationships, subjective well-being,  
49 behaviors and lifestyles.<sup>20</sup> Previous studies showed that adverse childhood experiences such  
50 as chronic economic stress can cause impairments in these health dimensions by disrupting  
51 various physiological systems in children.<sup>21</sup> Poor child health in turn limits a child's potential  
52 to interact successfully with the environments.<sup>22</sup> However, traditional AL markers cannot be

1  
2  
3 easily measured in children because of difficulty in blood sampling. To overcome this  
4 limitation, child health researchers have explored other noninvasive ways to collect biological  
5 samples from children for examination of objective physiological markers. An increasingly  
6 used method is to measure telomere length in children's buccal cells. Telomeres are essential  
7 components that protect the ends of chromosomes and shorten each time a cell divides. As a  
8 biomarker of cellular and biologic aging, telomere shortening is associated with a number of  
9 adverse health outcomes in adulthood. Previous studies on telomere length in children  
10 focused on severe environmental adversities in early childhood such as living in institutions<sup>23</sup>  
11 and prenatal tobacco exposure,<sup>24</sup> and demonstrated that adverse living environment led to  
12 telomere shortening in exposed children. Children with family adversity had been found to  
13 have shorter telomeres and greater cortisol reactivity to stress,<sup>25 26</sup> which were associated with  
14 poorer health outcomes later in life.<sup>27</sup> At present, telomere length is regarded as a marker of  
15 stress exposure in children.<sup>27</sup> However, evidence on the long term impact of telomere  
16 shortening since early childhood on health in adulthood is not yet available and warrants  
17 further research.

### 28 *Relationship between parental stress and child health*

29  
30 Research evidence shows that maternal stressful experiences during pregnancy and in  
31 early postnatal period can lead to biological changes including neuroendocrine, epigenetic,  
32 and neuroanatomical changes in children,<sup>28</sup> thereby increasing their risk for health and  
33 behavioral problems later in life. On the other hand, more health and behavioral problems in  
34 children may add to greater parental stress due to more caregiving responsibilities. This can  
35 further damage the parent-child relationship. A bidirectional relationship between specific  
36 form of parental stress such as parenting stress and child behaviors has been documented in  
37 some studies.<sup>12 13</sup> But little is known about the relationship between general form of parental  
38 stress and child health. In addition, previous research has been largely unidirectional,  
39 assuming that parental stress damages child health. The opposite direction that children  
40 influence parental stress is possible but scarcely studied.

### 41 *Potential mediators and moderators*

42  
43 Despite the health risks of economic hardship, certain individual and environmental  
44 factors might mitigate the negative consequences of growing up in a low-income  
45 household.<sup>27</sup> It has been posited that economic disadvantage is a risk factor for exposure to  
46 trauma and violence.<sup>1</sup> As illustrated in the Family Stress Model, low income can induce

1  
2  
3 pressure and stress which is associated with abusive parenting.<sup>29</sup> Different meta-analyses on  
4 childhood abusive experiences, particularly physical abuse, have found significantly shorter  
5 telomeres and more physical and mental health problems in abuse victims.<sup>30-32</sup> The Family  
6 Stress Model also emphasizes the importance of family relationship in children's lives. When  
7 economic pressure is high, economic hardship can exacerbate parental stress and increases  
8 conflicts and chaos in the family environment.<sup>33</sup> Children growing up in such hostile  
9 environment may have more behavioral problems<sup>34 35</sup> and a higher risk of obesity.<sup>36</sup>  
10 Furthermore, when children suffer health and behavioral problems, stressful parenting  
11 experiences can inflict other negative emotional symptoms such as anxiety and depression  
12 which may further exacerbate distress in parents<sup>37</sup>.

13  
14  
15  
16  
17  
18  
19  
20  
21 Although living on a low income can be stressful, many stressed parents are still able to  
22 provide adequate care to their children.<sup>38</sup> There is evidence that appropriate parenting  
23 behaviors such as use of reason rather than corporal punishment to discipline children can  
24 moderate the relationship between parenting stress and physical child abuse potential.<sup>39</sup>  
25 Many experts believe that authoritative parenting style is the most suitable parenting style in  
26 bringing up a child. Authoritative parenting practices are characterized by high  
27 responsiveness and reasonable demands such as setting concrete, age-appropriate  
28 expectations for children. Authoritative parenting style has been found to cause fewer  
29 behavioral and health problems in children<sup>40 41</sup>. In addition, neighborhood characteristics  
30 might also function to protect children against the negative consequences of parental stress.  
31 In cohesive neighborhoods where residents have a sense of trust and belongingness to each  
32 other, parents can seek support from their neighbors when they need help with childcare.  
33 Research show that more neighborhood cohesion predicts better development and behavioral  
34 outcomes in children.<sup>42</sup> Despite the established benefits, neither authoritative parenting style  
35 nor neighborhood cohesion has been studied as a moderator of the relationship between  
36 parental stress and child health.

### 47 48 *The present study*

49  
50 This study aims to explore whether there is a bi-directional relationship between  
51 parental stress and child health, and to examine the mediators and moderators of the  
52 relationship between parental stress and child health. The study conceptual model is shown in  
53 Figure 1. We hypothesize that there is a bi-directional relationship between parental stress  
54 and child health. We further hypothesize that family disharmony and child maltreatment are  
55  
56  
57  
58  
59  
60



mediators of the association between parental stress and child health, whereas authoritative parenting style and neighborhood cohesion moderate the association.

## Methods and analysis

### Study aims

- To estimate the prevalence of mild to high stress in low-income parents and the percentage of children with poorer HRQOL and more behavioral problems compared to the population norm.
- To examine the bidirectional relationship between parental stress and child health.
- To examine the correlation between changes in parental stress and changes in child health over time.
- To examine the associations between parents' perceived stress, HRQOL and allostatic load on the body.
- To examine the associations between children's HRQOL, behaviors, body mass index (BMI) z-score and telomere length.
- To identify the moderators and mediators of the relationship between parental stress and child health.

### Study design and setting

This is a prospective cohort study building upon an existing cohort study (main cohort study) on the effectiveness of the Trekkers Family Enhancement Scheme funded by a philanthropic foundation in Hong Kong (Kerry Group Kuok Foundation (Hong Kong) Limited).<sup>9 43</sup> This study will recruit parent-child pairs from low-income families and follow them up for 24 months with regular assessments on parental stress and child health using both subjective measures and objective physiological parameters. Additional data on health-related quality of life (HRQOL), family harmony, parenting style, neighborhood cohesion, and parental risk of child physical assault and neglect and mental health will also be collected at each assessment time point for testing mediating and moderating mechanisms between parental stress and child health. The baseline assessment will be conducted in 2016-17 with follow-up assessments at 12 and 24 months.

### Ethics

The ethics of this study has been approved by the institutional review board of the

University of Hong Kong – the Hospital Authority Hong Kong West Cluster, Reference number: UW 16-415.

### Sample size calculations

To examine the association of factors with outcomes, several rules of thumb have been proposed for calculation of the required sample size based on the number of factors including (i)  $10 \times (\text{number of factors})$ , (ii)  $50 + \text{number of factors}$  and (iii)  $50 + 8 \times (\text{number of factors})$ .<sup>44-46</sup> A total of 16 factors including the potential confounders will be involved in the current study. A range from 66 to 178 subjects based on these three rules of thumb will be needed. A previous study showed that rule (iii) is better than rule (i) and (ii) at 80% power and 5% level of significance if an moderate effect size of 0.3 is assumed.<sup>46</sup> Therefore, considering an effect size of 0.3 and an attrition rate of 30%, a minimum sample size of 254 parent-child pairs is needed to detect a moderate correlation between changes in parental stress and changes in child health over time at 80% power and 5% level of significance.

### Eligibility Criteria

Participants are parent-child pairs from low-income families. Each parent-child pair consists of an index child (i.e. the child agreeing to take part in cognitive assessment on recruitment) and his/her primary custodial parent (i.e. the parent spending a majority of the time with the index child). The participants also need to satisfy the following inclusion criteria and without any exclusion criteria:

#### *Inclusion criteria:*

- Family monthly household income does not exceed 75% of Hong Kong's median monthly household income; and
- At least one parent and one child aged 6 to 18 years of the same family have given consent to participate in the main cohort study.<sup>9 43</sup>

#### *Exclusion criteria:*

- Parents cannot speak or read Chinese;
- Children were born prematurely and/or with a congenital deformity; and
- Neither parent is the primary caregiver of the child.

### Recruitment

We will approach eligible participants in the main cohort study by telephone or during

1  
2  
3 face-to-face sessions. A research assistant will inform eligible participants about the study  
4 and will obtain information and signed consent from those who express interest in study  
5 participation. After providing consent, the parent of each participating parent-child pair will  
6 spend 45-60 minutes to complete a set of structured and standardized questionnaires on  
7 parental mental health and HRQOL, parenting style, their children's well-being and behaviors,  
8 and family and neighborhood environment. The questionnaires had been pilot-tested in  
9 several low-income parents and minor editing was done to ensure the questionnaires are  
10 comprehensible to the respondent. The questionnaires will be administered in two separate  
11 batches (the first includes parent and child measures and the second includes family and  
12 neighborhood measures). They will be administered by trained interviewers by face-to-face  
13 interview or telephone. If the parent cannot answer all the questionnaire items within one  
14 telephone interview or face-to-face session, the remaining unanswered items can be  
15 completed in next telephone interview session or self-completed at home and returned to the  
16 research office using our prepaid envelope. Physical examination on both the parent and child  
17 will include blood pressure, heart rate, weight, height, and waist-to-hip ratio. Each child will  
18 have a buccal cell swab taken for measurement of their telomere length and each adult will  
19 have a 15ml of venous blood sample taken for fasting glucose test, glycosylated haemoglobin  
20 test, and full lipid profile test.  
21  
22  
23  
24  
25  
26  
27  
28  
29  
30  
31  
32

### 33 **Assessment procedure**

34  
35 This study will have three assessment waves: T1 Baseline, T2 follow up (12 months),  
36 and T3 follow up (24 months). Table 1 shows the measurement and time points at which data  
37 will be collected.  
38  
39

40 Physical health data and biological samples will be collected by research nurses and  
41 research assistants during health assessment session held in community centers.  
42 Questionnaire data will be collected by trained interviewers during a telephone survey. To  
43 minimize attrition, a package of questionnaires and a sheet of instructions and equipment (i.e.  
44 brushes) for swab-taking at home may also be sent to parents upon request. Parent-child pairs  
45 will be reimbursed HK\$50 (US\$6.4) for the baseline and HK\$100 (US\$12.8) for the  
46 12-month and 24-month assessment.  
47  
48  
49  
50  
51  
52  
53  
54  
55  
56  
57  
58  
59  
60

**Table 1. Measures, tools and time-points for data collection**

|                                                                          | Baseline |        | 12-month follow-up |        | 24-month follow-up |        |
|--------------------------------------------------------------------------|----------|--------|--------------------|--------|--------------------|--------|
|                                                                          | Child    | Parent | Child              | Parent | Child              | Parent |
| <b>Social-economic status</b>                                            |          |        |                    |        |                    |        |
| Age                                                                      | x        | x      |                    |        |                    |        |
| Gender                                                                   | x        | x      |                    |        |                    |        |
| Marital Status                                                           |          | x      |                    |        |                    |        |
| Education Background                                                     |          | x      |                    |        |                    |        |
| Occupation                                                               |          | x      |                    |        |                    |        |
| Monthly Household Income                                                 |          | x      |                    | x      |                    | x      |
| Immigration Status                                                       |          | x      |                    |        |                    |        |
| Smoking/Drinking/Illicit Drug Use                                        |          | x      |                    |        |                    |        |
| <b>Health, Cognitive and Psychosocial Assessments</b>                    |          |        |                    |        |                    |        |
| SDQ                                                                      | x        |        | x                  |        | x                  |        |
| CHQ                                                                      | x        |        | x                  |        | x                  |        |
| WISC-IV-HK-SF                                                            | x        |        |                    |        |                    |        |
| DASS                                                                     |          | x      |                    | x      |                    | x      |
| PHQ-9                                                                    |          | x      |                    | x      |                    | x      |
| SF-12v2                                                                  |          | x      |                    | x      |                    | x      |
| Co-morbidities                                                           | x        | x      | x                  | x      | x                  | x      |
| <b>Family and Neighborhood</b>                                           |          |        |                    |        |                    |        |
| FHS-5                                                                    |          |        |                    | x      |                    | x      |
| Authoritative Parenting Style subscale of PSDQ                           |          |        |                    | x      |                    | x      |
| NCES                                                                     |          |        |                    | x      |                    | x      |
| Child Physical Assault and Neglect subscale of CTSPC                     |          |        |                    | x      |                    | x      |
| <b>Physical Assessments</b>                                              |          |        |                    |        |                    |        |
| Weight and Height                                                        | x        | x      | x                  | x      | x                  | x      |
| Waist Circumference and Hip Circumference                                | x        | x      | x                  | x      | x                  | x      |
| Blood Pressure and Heart Rate                                            | x        | x      | x                  | x      | x                  | x      |
| <b>Laboratory Tests</b>                                                  |          |        |                    |        |                    |        |
| Fasting Blood Glucose                                                    |          | x      |                    | x      |                    | x      |
| Glycated Haemoglobin                                                     |          | x      |                    | x      |                    | x      |
| Lipid Profile (Total Cholesterol, HDL and LDL Cholesterol, Triglyceride) |          | x      |                    | x      |                    | x      |
| Telomere Length                                                          | x        |        |                    |        | x                  |        |

**Abbreviations:** CHQ: Child Health Questionnaire; CTSPC: Parent Child Conflict Tactics Scale; DASS: Depression Anxiety Stress Scales; FHS: Family Harmony Scale; HDL: High-density lipoprotein; LDL: Low-density lipoprotein; PHQ: Patient Health Questionnaire; PSDQ: Parenting Style and Dimension Questionnaire; NCES: Neighborhood Collective Efficacy Scale; SDQ: Strength and Difficulties Questionnaire; SF-12v2: Short-Form Health Survey – the second version; WISC-IV-HK-SF: Wechsler Intelligence Scale for Children – Hong Kong (Short Form)

### **Maintenance Strategies**

This study will recruit participants from the main cohort study, which aims to evaluate the effectiveness of a Family Enhancement Scheme for a group of low-income families by comparing the health outcomes of the intervention and control groups.<sup>9</sup> The intervention group has been enrolled in the Family Enhancement Scheme since 2012 and has agreed to take part in a 15-year project. These participants are engaged through regular contacts at various family enhancement interventions and are supportive of related research activities. Control families with similar socio-economical background have been recruited by our research team and have agreed to be followed up for at least 5 years. To improve retention, free health assessments and incentives will be offered at each data collection time point. This strategy serves to attract low-income families who only have limited access to preventive health services, as most of these services are currently only offered in the private healthcare sector in Hong Kong. To maximize the sample size of this study, we will recruit all eligible parent-child pairs from intervention or control families of the Family Enhancement Scheme project. The potential grouping effect will be adjusted in the data analyses.

### **Study instrument and measures**

#### Child health

Child Health Questionnaire – Parent Form 50 (CHQ-PF50) is a parent proxy measure of children's physical and psychological wellbeing, with 50 items grouped into 12 multi-item subscales. The tool has good psychometric properties with Cronbach's alpha coefficient ranging from 0.66 to 0.94<sup>47</sup>. Its Chinese version has been used in local Chinese children.<sup>43 48</sup>

Strength and Difficulties Questionnaire (SDQ) is a 25-item parent-completed questionnaire measuring children's behavioral issues. The SDQ, with 5 subscales, has been translated into

1  
2  
3 traditional Chinese and tested with satisfactory reliability (Cronbach's alpha: 0.66 to 0.81)  
4 and validity in local children.<sup>43 49</sup>  
5  
6

7  
8 Telomere length: DNA will be extracted from buccal epithelial cells. Telomere length will be  
9 measured by the method adapted from that originally published by Cawthon.<sup>50</sup> For each  
10 sample, the telomere length will be represented by the relative ratio of the telomere repeat  
11 copy number (T) to the single copy gene 36BA copy number (S). The T/S ratio will be  
12 determined by quantitative polymerase chain reaction (qPCR) using a 7900HT Thermocycler  
13 (Applied Biosystems). The quality of extracted DNA, as indicated by the value  
14 of A260/A280 ratio, will be determined by using the NanoDrop 2000c spectrophotometer  
15 (Thermo Scientific).  
16  
17  
18  
19  
20  
21

22  
23 Body Mass Index (BMI) z-score: As BMI (calculated as weight/height<sup>2</sup>) changes rapidly in  
24 childhood, and growth patterns differ between boys and girls, BMI will be converted to  
25 z-score based on the international child growth reference.<sup>51</sup> This method allows for direct  
26 comparison of BMI and its changes across different ages and genders.  
27  
28  
29

### 30 Parental health

31  
32 Mental health: Depression Anxiety Stress Scale (DASS) has 3 subscales, each with 7 items  
33 rating the severity/frequency of symptoms of stress, anxiety and depression respectively. The  
34 total score of each dimension can be categorized as "normal", "mild", "moderate", "severe",  
35 and "extremely severe", according to the DASS manual<sup>52</sup>. DASS also has well-established  
36 psychometric properties<sup>52</sup> and been validated in Chinese population (Cronbach's alpha: 0.80  
37 to 0.82).<sup>53</sup> In addition, Patient Health Questionnaire – 9 (PHQ-9) will be used to screen for  
38 depression in parents. The Chinese version of PHQ-9 has been validated and used in previous  
39 local studies.<sup>43</sup>  
40  
41  
42  
43  
44  
45

46  
47 Quality of life: The SF-12 Health Survey-Version 2 (SF-12v2) is a 12-item quality of life  
48 assessment instrument, producing 8 subscales and 2 composite summary scores. The Chinese  
49 version of SF-12v2 has been validated and normed in local Chinese population with  
50 Cronbach's alpha coefficient ranging from 0.60 to 0.89.<sup>43 54 55</sup>  
51  
52  
53

54  
55 Allostatic load index: A review of literature has identified a set of physiological parameters  
56 that can reflect AL and yet be conveniently measured, including blood pressure, heart rate,  
57  
58  
59

1  
2  
3 BMI, waist-to-hip ratio, lipid profile, fasting glucose and glycosylated haemoglobin.<sup>18</sup> This  
4 set of physiological parameters will be measured and included in the calculation of AL index  
5 in this study. An index score of AL is calculated by summing the number of parameters that  
6 fall into the “highest” risk quartile defined by local clinical practice guidelines.  
7  
8  
9

10  
11 Screening for depression: Patient Health Questionnaire – 9 (PHQ – 9) is used to screen for  
12 depression in the parent. The Chinese version of PHQ-9 has been validated and used in  
13 previous local studies (Cronbach’s alpha: 0.82).<sup>43</sup>  
14  
15

### 16 17 Family and neighborhood environment

18  
19 Family environment: The Chinese version of Family Harmony Scale – 5 (FHS-5) will be  
20 used to measure family harmony (Cronbach’s alpha: 0.92).<sup>56</sup> Parental risk of physically  
21 abusing and neglecting children as well as their parenting style will also be assessed with the  
22 Child Physical Assault and Neglect subscale of the Parent Child Conflict Tactics Scale  
23 (CTSPC) (Cronbach’s alpha: 0.77 to 0.88)<sup>57</sup> and the Authoritative Parenting Style subscale  
24 of the Parenting Style and Dimension Questionnaire (PSDQ) (Cronbach’s alpha: 0.71 to  
25 0.97),<sup>58 59</sup> respectively.  
26  
27  
28  
29  
30

31  
32 Neighborhood: The Chinese version of Neighborhood Collective Efficacy Scale (NCES) is a  
33 10-item scale, with five items each on informal social control and social cohesion  
34 (Cronbach’s alpha: 0.63).<sup>60</sup>  
35  
36  
37

38  
39 The following socio-demographic characteristics will be considered to be potential  
40 confounding factors on the basis of their potential associations with parental stress and child  
41 health: household income, children’s age and gender, and parental age and gender, education  
42 level, occupation, marital status, and immigration status. Parental history of smoking,  
43 drinking and illicit drug use, occupation and marital status, comorbidities of parents and  
44 children, and household income will be recorded at baseline and follow-ups. The cognitive  
45 abilities of the child from each household were assessed by a clinical psychologist using the  
46 Wechsler Intelligence Scale for Children Fourth Edition – Hong Kong (Short Form)  
47 (WISC-IV-HK-SF) at the time of enrollment into the main cohort study. Data on such  
48 estimation of intelligence quotient (I.Q.) of the children will be retrieved and used as a  
49 confounder in the study.  
50  
51  
52  
53  
54  
55  
56  
57  
58  
59  
60

## Data processing and analysis

Descriptive statistics will be used to summarize the characteristics of parents and children at baseline and each follow-up time point. Parents with a cut-off score of  $\geq 15$  in stress dimension of DASS will be considered as having at least mild stress as referenced by the DASS manual<sup>52</sup>. The psychometric properties such as construct validity, convergent and divergent validity, and Cronbach's alphas for the scales used will also be reported. Missing data will be handled using full information maximum likelihood in the estimation of path models. This method is robust against biases from data missing at random (MAR). Latent growth modelling will be conducted to obtain how the parental stress and child health changes over times. The bidirectional relationship between parental stress and child health over times will be determined using cross-lagged path model (Figure 2).<sup>61</sup> Linear mixed effect model, including subjects as random effects, will be performed to evaluate the association between parental variables and between children's variables. Mediation and moderation analysis will also be conducted to map out the mechanism by which the variables relate. All analyses will control for a range of confounding factors with the following variables as outcomes/mediators/moderators:

### *Primary exposures/outcomes*

- Child CHQ General Health Perceptions subscale score
- Parental DASS Stress subscale score

### *Secondary outcomes*

- Child SDQ Total Difficulty score
- Child DNA telomere length
- Child BMI z-score
- Parental allostatic load index
- Parental SF-12v2 HRQOL scores

### *Mediators of the relationship between parental stress and child health*

- Parental mental health: depression (PHQ-9 score), DASS Depression and Anxiety subscale score
- Family disharmony measured by FHS-5
- Child physical assault and neglect potential measured by the Physical Assault and Neglect subscale of the CTSPC

### *Moderators of the relationship between parental stress and child health*

- Authoritative parenting style measured by the Authoritative Parenting Style subscale of



1  
2  
3 the PSDQ

- 4 • Neighbourhood cohesion measured by NCES  
5  
6  
7

8 Potential confounders include sociodemographic information (parental age and gender,  
9 child age and gender, household income, parental occupation, and marital status), parental  
10 history of smoking, drinking and illicit drug use, parental and child history of comorbidities  
11 and child cognitive skills. All statistical analyses will be performed using IBM SPSS  
12 Statistics and Mplus. All significance tests will be two-tailed and findings with a p-value less  
13 than 0.05 will be considered statistically significant.  
14  
15  
16  
17

## 18 **Discussion**

19  
20 Chronic exposure to stressors and dangers of poverty can have a detrimental impact on  
21 the health of parents and their children. It is important to mitigate the effect of poverty  
22 through protective mechanisms, the development of which should be guided by empirical  
23 evidence. Although it is known that poverty and poor health are linked with each other, the  
24 present research, with an aim to elucidate the relationship between parental stress and child  
25 health in low-income families, will give further insights into the possible vicious cycle of ill  
26 health between parents and children, an aspect that is often overlooked. For example, the  
27 question of whether changes in parental stress correlate with changes in child health over  
28 time and its magnitude will be investigated. The result will inform various stakeholders about  
29 the potential of improvement through interventions on parental stress and child health.  
30  
31  
32  
33  
34  
35  
36  
37

38  
39 In addition to parent-proxy reports of children's general health, measurement of  
40 telomere length in children will provide more convincing evidence on the biological health of  
41 the children at cellular level. We will also measure child BMI z-score which is a recognized  
42 indicator of child health to reflect the growth of the children. The results will help to establish  
43 the robustness of assessing child general health using parent-proxy report and/or telomere  
44 length as a measure of child health for either clinical use or future research purposes.  
45 Moreover, parental allostatic load index will also be studied in this research. The index  
46 represents the sum of physiological dysregulations in the body of an individual in response to  
47 chronic stressful situation prior to onset of medical illnesses, and is measured by a  
48 combination of biomarkers of health such as blood pressure and plasma glucose level. The  
49 total "stress load" is presented as a composite score, the allostatic load index, which predicts  
50 morbidity and mortality. These results will provide the public with evidence of the biological  
51  
52  
53  
54  
55  
56  
57  
58

1  
2  
3 impact of perceived stress on parents.  
4  
5

6 Furthermore, this study will examine the mediators of the parent-child health  
7 relationship. The findings would inform healthcare providers and policy makers on the  
8 potential targets for intervention to improve both parental and child health (e.g. interventions  
9 for intimate partner abuse and family disharmony, or enhanced care for depression and  
10 anxiety). On the other hand, moderation analysis will focus on authoritative parenting style  
11 and neighbourhood cohesion. These two factors were selected because of their potentials for  
12 improvement through interventions, e.g. parenting skill training and community fun day,  
13 which deem feasible and may benefit the whole community. For policy makers, the results  
14 could be useful for informing the design of a holistic approach to address children's health  
15 issues and parental stress. Ultimately, targeted interventions at risk factors identified by this  
16 study can be developed at the community level to improve the health of parents and children  
17 of low-income families.  
18  
19  
20  
21  
22  
23  
24  
25  
26

27 This study has several strengths and limitations. Some children in this study are quite  
28 young and may not be able to give reliable information on their own health status. Children's  
29 HRQOL and behaviors will therefore be proxy-reported by their parents. Despite this  
30 limitation, this study not only assesses participants' perceived health status but also uses  
31 objective measures such as telomere length measurement and allostatic load index calculation  
32 to give a holistic view of the health conditions of study participants. The inclusion of both  
33 objective and participant-reported outcomes can increase the reliability of the findings by  
34 reducing response bias. In addition, this study provides longitudinal data which make it  
35 possible to examine cause-effect relationships between variables. The results will be useful to  
36 advance our understanding of the linkage between parental and child health. However, this  
37 study focuses on a subgroup of low-income families in Hong Kong which is not a  
38 population-representative sample and hence the findings may not be generalizable to other  
39 populations. Moreover, in order to reduce the respondent burden (and response rate) in the  
40 completion of the large number of questionnaires, the outcomes will be measured only at  
41 three time points. Further follow-up assessment should be conducted if resources are  
42 available.  
43  
44  
45  
46  
47  
48  
49  
50  
51  
52  
53

#### 54 **Ethics and dissemination**

55 This study was approved by the institutional review board of the University of Hong Kong –  
56  
57  
58  
59  
60

1  
2  
3 the Hospital Authority Hong Kong West Cluster, Reference number: UW 16-415. The study  
4 findings will be disseminated through peer-reviewed publications and international  
5 conferences.  
6  
7

## 8 9 **References**

- 10 1. Santiago CD, Kaltman S, Miranda J. Poverty and Mental Health: How Do Low-Income  
11 Adults and Children Fare in Psychotherapy? *Journal of Clinical Psychology*  
12 2013;69(2):115-26.  
13
- 14 2. Lantz PM, House JS, Mero RP, et al. Stress, Life Events, and Socioeconomic Disparities in  
15 Health: Results from the Americans' Changing Lives Study\*. *Journal of health and*  
16 *social behavior* 2005;46(3):274-88.  
17
- 18 3. Guedes A, Bott S, Garcia-Moreno C, et al. Bridging the gaps: a global review of  
19 intersections of violence against women and violence against children. *Global health*  
20 *action* 2016;9(1):31516.  
21
- 22 4. He W, James SA, Merli MG, et al. An increasing socioeconomic gap in childhood  
23 overweight and obesity in China. *American journal of public health*  
24 2014;104(1):e14-e22.  
25
- 26 5. Ip P, Ho FKW, So H-K, et al. Socioeconomic gradient in childhood obesity and hypertension:  
27 A multilevel population-based study in a Chinese community. *PLoS one*  
28 2016;11(6):e0156945.  
29
- 30 6. The Government of the Hong Kong Special Administrative Region. Hong Kong Poverty  
31 Situation Report 2013. 2013:169.  
32
- 33 7. Subramanian SV, Kawachi I. Income inequality and health: what have we learned so far?  
34 *Epidemiologic reviews* 2004;26(1):78-91.  
35
- 36 8. Wong RSM, Guo VY, Ip P, et al. Mothers' health-related quality of life: its relationship with  
37 children's health-related quality of life and behavior in low income families. *Family*  
38 *Medicine and Community Health* 2016 4(4):4-12.  
39
- 40 9. Lam CLK, Guo VY, Wong CKH, et al. Poverty and health-related quality of life of people  
41 living in Hong Kong: comparison of individuals from low-income families and the  
42 general population. *J Public Health (Oxf)* 2017;39(2):258-65. doi:  
43 10.1093/pubmed/fdw046  
44
- 45 10. Conger RD, Wallace LE, Sun Y, et al. Economic pressure in African American families: a  
46 replication and extension of the family stress model. *Developmental psychology*  
47 2002;38(2):179.  
48
- 49 11. Evans GW, Kim P. Childhood poverty, chronic stress, self-regulation, and coping. *Child*  
50 *Development Perspectives* 2013;7(1):43-48.  
51
- 52 12. Neece CL, Green SA, Baker BL. Parenting stress and child behavior problems: A  
53 transactional relationship across time. *American Journal on Intellectual and*  
54  
55  
56  
57  
58

- 1  
2  
3 *Developmental Disabilities* 2012;117(1):48-66.
- 4 13. Stone LL, Mares SH, Otten R, et al. The Co-Development of Parenting Stress and  
5 Childhood Internalizing and Externalizing Problems. *Journal of Psychopathology and*  
6 *Behavioral Assessment* 2016;38(1):78-86.
- 7  
8 14. Slack KS, Holl JL, McDaniel M, et al. Understanding the risks of child neglect: An  
9 exploration of poverty and parenting characteristics. *Child maltreatment*  
10 2004;9(4):395-408.
- 11  
12 15. Masarik AS, Conger RD. Stress and child development: A review of the Family Stress  
13 Model. *Current Opinion in Psychology* 2017;13:85-90.
- 14  
15 16. Cronin S, Becher E, Christians KS, et al. Parents and stress: Understanding experiences,  
16 context, and responses: St. Paul, MN: University of Minnesota Extension, Children,  
17 Youth and Family Consortium 2015.
- 18  
19 17. Belsky J. The determinants of parenting: A process model. *Child development*  
20 1984;55(1):83-96.
- 21  
22 18. Juster R-P, McEwen BS, Lupien SJ. Allostatic load biomarkers of chronic stress and impact  
23 on health and cognition. *Neuroscience & Biobehavioral Reviews* 2010;35(1):2-16.
- 24  
25 19. McEwen BS. Allostasis and allostatic load: implications for neuropsychopharmacology.  
26 *Neuropsychopharmacology* 2000;22(2):108-24.
- 27  
28 20. UNICEF. Child poverty in perspective: An overview of child well-being in rich countries.  
29 Innocenti Report Card 7. Florence, Italy: UNICEF Innocenti Research Centre, 2007.
- 30  
31 21. Luecken LJ, Lemery KS. Early caregiving and physiological stress responses. *Clinical*  
32 *psychology review* 2004;24(2):171-91.
- 33  
34 22. National Research Council. Children's health, the Nation's wealth: assessing and  
35 improving child health. *National Academic Press* 2004
- 36  
37 23. Drury SS, Theall K, Gleason MM, et al. Telomere length and early severe social  
38 deprivation: linking early adversity and cellular aging. *Molecular psychiatry*  
39 2012;17(7):719-27.
- 40  
41 24. Ip P, Chung BHY, Ho FKW, et al. Prenatal tobacco exposure shortens telomere length in  
42 children. *Nicotine & Tobacco Research* 2017;19(1):111-18.
- 43  
44 25. Asok A, Bernard K, Roth T, et al. Parental responsiveness moderates the association  
45 between early-life stress and reduced telomere length. *Development and*  
46 *psychopathology* 2013;25(3):577-85.
- 47  
48 26. Gotlib I, LeMoult J, Colich N, et al. Telomere length and cortisol reactivity in children of  
49 depressed mothers. *Molecular psychiatry* 2015;20(5):615-20.
- 50  
51 27. Theall KP, Brett ZH, Shirtcliff EA, et al. Neighborhood disorder and telomeres: Connecting  
52 children's exposure to community level stress and cellular response. *Social Science &*  
53 *Medicine* 2013;85:50-58.
- 54  
55 28. Bowers ME, Yehuda R. Intergenerational Transmission of Stress in Humans.
- 56  
57  
58  
59  
60

- 1  
2  
3 *Neuropsychopharmacology* 2016;41(1):232-44.
- 4 29. Rodriguez CM, Green AJ. Parenting stress and anger expression as predictors of child  
5 abuse potential. *Child Abuse & Neglect* 1997;21(4):367-77.
- 6 30. Ridout K, Levandowski M, Ridout S, et al. Early life adversity and telomere length: a  
7 meta-analysis. *Molecular psychiatry* 2017 doi: 10.1038/mp.2017.26
- 8 31. Norman RE, Byambaa M, De R, et al. The long-term health consequences of child  
9 physical abuse, emotional abuse, and neglect: a systematic review and meta-analysis.  
10 *PLoS medicine* 2012;9(11):e1001349.
- 11 32. Ip P, Wong RS, Li SL, et al. Mental health consequences of childhood physical abuse in  
12 Chinese populations: a meta-analysis. *Trauma, Violence, & Abuse* 2016;17(5):571-84.
- 13 33. Conger RD, Conger KJ, Martin MJ. Socioeconomic status, family processes, and individual  
14 development. *Journal of Marriage and Family* 2010;72(3):685-704.
- 15 34. Katz LF, Woodin EM. Hostility, hostile detachment, and conflict engagement in marriages:  
16 Effects on child and family functioning. *Child development* 2002;73(2):636-52.
- 17 35. Guo VY, Yu EYT, Wong RSM, et al. Maternal mental quality of life mediates the  
18 associations between intimate partner abuse against mothers and their children's  
19 behaviours and quality of life in low-income Chinese families. *Quality of Life Research*  
20 2017 doi: 10.1007/s11136-017-1664-8
- 21 36. Halliday JA, Palma CL, Mellor D, et al. The relationship between family functioning and  
22 child and adolescent overweight and obesity: a systematic review. *International*  
23 *journal of obesity* 2014;38(4):480-93. doi: 10.1038/ijo.2013.213
- 24 37. Cousino MK, Hazen RA. Parenting Stress Among Caregivers of Children With Chronic  
25 Illness: A Systematic Review. *Journal of Pediatric Psychology* 2013;38(8):809-28. doi:  
26 10.1093/jpepsy/jst049
- 27 38. Egeland BR, Breitenbucher M, Rosenberg D. Prospective study of the significance of life  
28 stress in the etiology of child abuse. *Journal of Consulting and Clinical Psychology*  
29 1980;48(2):195.
- 30 39. Crouch JL, Behl LE. Relationships among parental beliefs in corporal punishment,  
31 reported stress, and physical child abuse potential. *Child Abuse & Neglect*  
32 2001;25(3):413-19. doi: [https://doi.org/10.1016/S0145-2134\(00\)00256-8](https://doi.org/10.1016/S0145-2134(00)00256-8)
- 33 40. Pinquart M, Kauser R. Do the Associations of Parenting Styles With Behavior Problems  
34 and Academic Achievement Vary by Culture? Results From a Meta-Analysis. 2017 doi:  
35 10.1037/cdp0000149
- 36 41. Sokol RL, Qin B, Poti J. Parenting styles and body mass index: a systematic review of  
37 prospective studies among children. *Obesity Reviews* 2017;18(3):281-92.
- 38 42. Minh A, Muhajarine N, Janus M, et al. A review of neighborhood effects and early child  
39 development: How, where, and for whom, do neighborhoods matter? *Health & Place*  
40 2017;46:155-74.
- 41  
42  
43  
44  
45  
46  
47  
48  
49  
50  
51  
52  
53  
54  
55  
56  
57  
58  
59  
60

- 1  
2  
3 43. Fung CSC, Yu EYT, Guo VY, et al. Development of a Health Empowerment Programme to  
4 improve the health of working poor families: protocol for a prospective cohort study  
5 in Hong Kong. *BMJ open* 2016;6(2):e010015.  
6  
7 44. Cohen J. Statistical power analysis for the behavior science. *Lawrance Erlbaum*  
8 *Association* 1988  
9  
10 45. Harris RJ. A primer of multivariate statistics: Psychology Press 2001.  
11  
12 46. Green SB. How many subjects does it take to do a regression analysis. *Multivariate*  
13 *behavioral research* 1991;26(3):499-510.  
14  
15 47. Landgraf JM, Abetz L, Ware JE. Child Health Questionnaire (CHQ): A user's manual:  
16 Health Institute, New England Medical Center Boston 2013.  
17  
18 48. Lee S, Cheung Y, Wong H, et al. Chronic health problems and health-related quality of life  
19 in Chinese children and adolescents: a population-based study in Hong Kong. *BMJ*  
20 *open* 2013;3(1):e001183.  
21  
22 49. Lai KY, Luk ES, Leung PW, et al. Validation of the Chinese version of the strengths and  
23 difficulties questionnaire in Hong Kong. *Social psychiatry and psychiatric*  
24 *epidemiology* 2010;45(12):1179-86.  
25  
26 50. Cawthon RM. Telomere measurement by quantitative PCR. *Nucleic acids research*  
27 2002;30(10):e47-e47.  
28  
29 51. Dinsdale H, Ridler C, Ells L. A simple guide to classifying body mass index in children.  
30 *National Obesity Observatory, Oxford* 2011  
31  
32 52. Lovibond PF, Lovibond SH. The structure of negative emotional states: Comparison of the  
33 Depression Anxiety Stress Scales (DASS) with the Beck Depression and Anxiety  
34 Inventories. *Behaviour research and therapy* 1995;33(3):335-43.  
35  
36 53. Wang K, Shi H-S, Geng F-L, et al. Cross-cultural validation of the Depression Anxiety  
37 Stress Scale-21 in China. *Psychological assessment* 2016;28(5):e88.  
38  
39 54. Lam C, Wong C, Lam E, et al. Population norm of Chinese (HK) SF-12 health  
40 survey-version 2 of Chinese adults in Hong Kong. *Hong Kong Practitioner*  
41 2010;32(2):77-86.  
42  
43 55. Lam ET, Lam CL, Fong DY, et al. Is the SF-12 version 2 Health Survey a valid and equivalent  
44 substitute for the SF-36 version 2 Health Survey for the Chinese? *Journal of*  
45 *evaluation in clinical practice* 2013;19(1):200-08.  
46  
47 56. Kavikondala S, Stewart SM, Ni MY, et al. Structure and Validity of Family Harmony Scale:  
48 An Instrument for Measuring Harmony. *Psychological assessment* 2016;28(3):307.  
49  
50 57. Chan KL, Brownridge DA, Fong DY, et al. Violence against pregnant women can increase  
51 the risk of child abuse: a longitudinal study. *Child abuse & neglect* 2012;36(4):275-84.  
52  
53 58. Wu P, Robinson CC, Yang C, et al. Similarities and differences in mothers' parenting of  
54 preschoolers in China and the United States. *International Journal of Behavioral*  
55 *Development* 2002;26(6):481-91.  
56  
57  
58  
59

- 1  
2  
3 59. Olivari MG, Tagliabue S, Confalonieri E. Parenting Style and Dimensions Questionnaire: A  
4 review of reliability and validity. *Marriage & Family Review* 2013;49(6):465-90.  
5  
6 60. Chou K-L. Perceived discrimination and depression among new migrants to Hong Kong:  
7 The moderating role of social support and neighborhood collective efficacy. *Journal*  
8 *of affective disorders* 2012;138(1):63-70.  
9  
10 61. Stone LL, Mares SH, Otten R, et al. The Co-Development of Parenting Stress and  
11 Childhood Internalizing and Externalizing Problems. *Journal of Psychopathology and*  
12 *Behavioral Assessment* 2015;38(1):76-86.  
13  
14  
15  
16  
17

### 18 **Acknowledgements**

19  
20 We are most grateful to Kerry Group Kuok Foundation (Hong Kong) Limited (KGKF) for  
21 their support. We thank the Neighborhood Advice-Action Council (NAAC) and Yat Tung (I/II)  
22 Estate Property Management in providing venue for our study. A special thanks to Versitech  
23 Ltd for granting us a complementary license to use the OPine Software for data collection in  
24 our study. The timely completion of the telephone surveys by the HKU Social Science  
25 Research Center is much appreciated. The hard work of our research staff in data collection  
26 and analysis must be acknowledged.  
27  
28  
29  
30  
31  
32  
33  
34  
35  
36

### 37 **Contributions**

38 RSMW, EYTY and CLKL conceived the study concept, developed the funding proposal and  
39 applied for funding. RSMW, EYTY, VYG, CKHW, CSCF coordinates the project. EYFW  
40 and CKHW developed the statistical analysis plan, and contributed to the interpretation of  
41 data. KTST and WHSW provided input regarding the telomere length assay and  
42 interpretation aspects of the study. WYC, PI, AFYT provided expert opinion in mental health,  
43 child development and family relationship aspects of the protocol respectively. CLKL is the  
44 funding holder of the community family support programme for low-income families in  
45 Hong Kong funded by a philanthropic foundation in Hong Kong (Kerry Group Kuok  
46 Foundation (Hong Kong) Limited). EYTY is the principal investigator and the grant holder of  
47  
48  
49  
50  
51  
52  
53  
54  
55  
56  
57  
58  
59  
60

1  
2  
3 the Health and Medical Research Fund of Hong Kong (HMRF/14151571). RSMW, EYTY  
4 and CLKL initiated the writing of the protocol paper. All authors revised and approved the  
5  
6 final version of the manuscript.  
7  
8  
9

## 10 11 **Funding**

12  
13 This study was supported by Kerry Group Kuok Foundation (Hong Kong) Limited and the  
14  
15 Health and Medical Research Fund of Hong Kong (HMRF/14151571).  
16  
17  
18  
19

## 20 **Competing interests**

21  
22 The authors declare no conflict of interest.  
23  
24  
25  
26  
27  
28

## 29 **Figure legend**

30  
31 **Figure 1.** Study conceptual model. Potential confounders include baseline sociodemographic  
32  
33 information (parental age and gender, child age and gender, household income, parental  
34  
35 occupation, and marital status), parental history of smoking, drinking and illicit drug use,  
36  
37 parental and child history of comorbidities and child cognitive skills.  
38

39 **Figure 2.** Hypothesized cross-lagged path model predicting child health and parental stress  
40  
41 from baseline to 24-months follow-up.  
42  
43  
44  
45  
46  
47  
48  
49  
50  
51  
52  
53  
54  
55  
56  
57  
58  
59  
60





25 Figure 1. Study conceptual model. Potential confounders include baseline sociodemographic information  
 26 (parental age and gender, child age and gender, household income, parental occupation, and marital  
 27 status), parental history of smoking, drinking and illicit drug use, parental and child history of comorbidities  
 28 and child cognitive skills.

29 108x58mm (300 x 300 DPI)

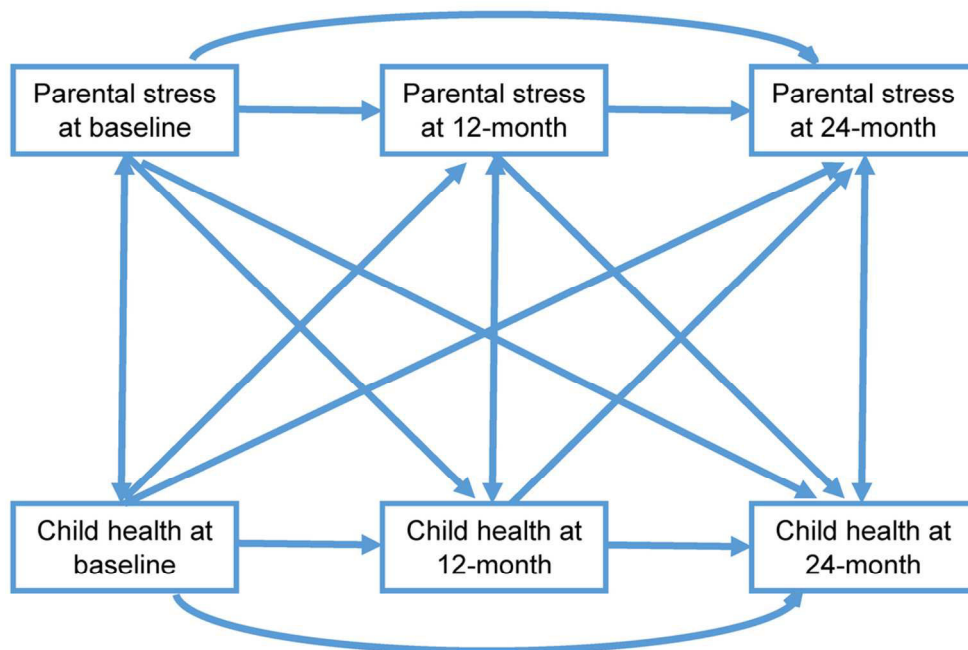

Figure 2. Hypothesized cross-lagged path model predicting child health and parental stress from baseline to 24-months follow-up.

102x68mm (300 x 300 DPI)

Review only

**STROBE 2007 (v4) Statement—Checklist of items that should be included in reports of cohort studies**

| Section/Topic             | Item # | Recommendation                                                                                                                                                                       | Reported on page # |
|---------------------------|--------|--------------------------------------------------------------------------------------------------------------------------------------------------------------------------------------|--------------------|
| Title and abstract        | 1      | (a) Indicate the study’s design with a commonly used term in the title or the abstract                                                                                               | 2                  |
|                           |        | (b) Provide in the abstract an informative and balanced summary of what was done and what was found                                                                                  | 2                  |
| <b>Introduction</b>       |        |                                                                                                                                                                                      |                    |
| Background/rationale      | 2      | Explain the scientific background and rationale for the investigation being reported                                                                                                 | 4-8                |
| Objectives                | 3      | State specific objectives, including any prespecified hypotheses                                                                                                                     | 8                  |
| <b>Methods</b>            |        |                                                                                                                                                                                      |                    |
| Study design              | 4      | Present key elements of study design early in the paper                                                                                                                              | 8                  |
| Setting                   | 5      | Describe the setting, locations, and relevant dates, including periods of recruitment, exposure, follow-up, and data collection                                                      | 8                  |
| Participants              | 6      | (a) Give the eligibility criteria, and the sources and methods of selection of participants. Describe methods of follow-up                                                           | 9                  |
|                           |        | (b) For matched studies, give matching criteria and number of exposed and unexposed                                                                                                  | NA                 |
| Variables                 | 7      | Clearly define all outcomes, exposures, predictors, potential confounders, and effect modifiers. Give diagnostic criteria, if applicable                                             | 14                 |
| Data sources/ measurement | 8*     | For each variable of interest, give sources of data and details of methods of assessment (measurement). Describe comparability of assessment methods if there is more than one group | 11-13              |
| Bias                      | 9      | Describe any efforts to address potential sources of bias                                                                                                                            | 10-14              |
| Study size                | 10     | Explain how the study size was arrived at                                                                                                                                            | 9                  |
| Quantitative variables    | 11     | Explain how quantitative variables were handled in the analyses. If applicable, describe which groupings were chosen and why                                                         | 13-14              |
| Statistical methods       | 12     | (a) Describe all statistical methods, including those used to control for confounding                                                                                                | 13-14              |
|                           |        | (b) Describe any methods used to examine subgroups and interactions                                                                                                                  | 13-14              |
|                           |        | (c) Explain how missing data were addressed                                                                                                                                          | NA                 |
|                           |        | (d) If applicable, explain how loss to follow-up was addressed                                                                                                                       | 13-14              |
|                           |        | (e) Describe any sensitivity analyses                                                                                                                                                | NA                 |
| <b>Results</b>            |        |                                                                                                                                                                                      |                    |

|                          |     |                                                                                                                                                                                                              |       |
|--------------------------|-----|--------------------------------------------------------------------------------------------------------------------------------------------------------------------------------------------------------------|-------|
| Participants             | 13* | (a) Report numbers of individuals at each stage of study—eg numbers potentially eligible, examined for eligibility, confirmed eligible, included in the study, completing follow-up, and analysed            | NA    |
|                          |     | (b) Give reasons for non-participation at each stage                                                                                                                                                         | NA    |
|                          |     | (c) Consider use of a flow diagram                                                                                                                                                                           | NA    |
| Descriptive data         | 14* | (a) Give characteristics of study participants (eg demographic, clinical, social) and information on exposures and potential confounders                                                                     | NA    |
|                          |     | (b) Indicate number of participants with missing data for each variable of interest                                                                                                                          | NA    |
|                          |     | (c) Summarise follow-up time (eg, average and total amount)                                                                                                                                                  | NA    |
| Outcome data             | 15* | Report numbers of outcome events or summary measures over time                                                                                                                                               | NA    |
| Main results             | 16  | (a) Give unadjusted estimates and, if applicable, confounder-adjusted estimates and their precision (eg, 95% confidence interval). Make clear which confounders were adjusted for and why they were included | NA    |
|                          |     | (b) Report category boundaries when continuous variables were categorized                                                                                                                                    | NA    |
|                          |     | (c) If relevant, consider translating estimates of relative risk into absolute risk for a meaningful time period                                                                                             | NA    |
| Other analyses           | 17  | Report other analyses done—eg analyses of subgroups and interactions, and sensitivity analyses                                                                                                               | 13-14 |
| <b>Discussion</b>        |     |                                                                                                                                                                                                              |       |
| Key results              | 18  | Summarise key results with reference to study objectives                                                                                                                                                     | 14-16 |
| <b>Limitations</b>       |     |                                                                                                                                                                                                              |       |
| Interpretation           | 20  | Give a cautious overall interpretation of results considering objectives, limitations, multiplicity of analyses, results from similar studies, and other relevant evidence                                   | 14-16 |
| Generalisability         | 21  | Discuss the generalisability (external validity) of the study results                                                                                                                                        | 14-16 |
| <b>Other information</b> |     |                                                                                                                                                                                                              |       |
| Funding                  | 22  | Give the source of funding and the role of the funders for the present study and, if applicable, for the original study on which the present article is based                                                | 21    |

\*Give information separately for cases and controls in case-control studies and, if applicable, for exposed and unexposed groups in cohort and cross-sectional studies.

**Note:** An Explanation and Elaboration article discusses each checklist item and gives methodological background and published examples of transparent reporting. The STROBE checklist is best used in conjunction with this article (freely available on the Web sites of PLoS Medicine at <http://www.plosmedicine.org/>, Annals of Internal Medicine at <http://www.annals.org/>, and Epidemiology at <http://www.epidem.com/>). Information on the STROBE Initiative is available at [www.strobe-statement.org](http://www.strobe-statement.org).

# BMJ Open

## A prospective cohort study to investigate parental stress and child health in low-income Chinese families: protocol paper

|                                 |                                                                                                                                                                                                                                                                                                                                                                                                                                                                                                                                                                                                                                                                                                                                                                                                                                                                                                                                                                                                                                                                                                                                                                       |
|---------------------------------|-----------------------------------------------------------------------------------------------------------------------------------------------------------------------------------------------------------------------------------------------------------------------------------------------------------------------------------------------------------------------------------------------------------------------------------------------------------------------------------------------------------------------------------------------------------------------------------------------------------------------------------------------------------------------------------------------------------------------------------------------------------------------------------------------------------------------------------------------------------------------------------------------------------------------------------------------------------------------------------------------------------------------------------------------------------------------------------------------------------------------------------------------------------------------|
| Journal:                        | <i>BMJ Open</i>                                                                                                                                                                                                                                                                                                                                                                                                                                                                                                                                                                                                                                                                                                                                                                                                                                                                                                                                                                                                                                                                                                                                                       |
| Manuscript ID                   | bmjopen-2017-018792.R2                                                                                                                                                                                                                                                                                                                                                                                                                                                                                                                                                                                                                                                                                                                                                                                                                                                                                                                                                                                                                                                                                                                                                |
| Article Type:                   | Protocol                                                                                                                                                                                                                                                                                                                                                                                                                                                                                                                                                                                                                                                                                                                                                                                                                                                                                                                                                                                                                                                                                                                                                              |
| Date Submitted by the Author:   | 11-Jan-2018                                                                                                                                                                                                                                                                                                                                                                                                                                                                                                                                                                                                                                                                                                                                                                                                                                                                                                                                                                                                                                                                                                                                                           |
| Complete List of Authors:       | Wong, Rosa Sze Man; The University of Hong Kong, Department of Family Medicine and Primary Care<br>Yu, Esther Yee Tak; The University of Hong Kong, Department of Family Medicine and Primary Care<br>Guo, Vivian Yawei; The University of Hong Kong, Department of Family Medicine and Primary Care<br>Wan, Eric; The University of Hong Kong, Department of Family Medicine and Primary Care<br>Chin, Weng Yee; The University of Hong Kong, Department of Family Medicine and Primary Care<br>Wong, Carlos; The University of Hong Kong, Department of Family Medicine and Primary Care<br>Fung, Colman; The University of Hong Kong, Department of Family Medicine and Primary Care<br>Tung, Keith Tsz-Suen; The University of Hong Kong, Department of Paediatrics and Adolescent Medicine<br>Wong, HSW; The University of Hong Kong, Department of Paediatrics and Adolescent Medicine<br>Ip, Patrick; The University of Hong Kong, Department of Paediatrics and Adolescent Medicine<br>Tiwari, Agnes Fung Yee ; Hong Kong Sanatorium & Hospital, School of Nursing<br>Lam, Cindy; The University of Hong Kong, Department of Family Medicine and Primary Care |
| <b>Primary Subject Heading</b>: | Mental health                                                                                                                                                                                                                                                                                                                                                                                                                                                                                                                                                                                                                                                                                                                                                                                                                                                                                                                                                                                                                                                                                                                                                         |
| Secondary Subject Heading:      | Epidemiology, General practice / Family practice, Health services research, Paediatrics                                                                                                                                                                                                                                                                                                                                                                                                                                                                                                                                                                                                                                                                                                                                                                                                                                                                                                                                                                                                                                                                               |
| Keywords:                       | Parental stress, Child health, Health-related quality of life, Bidirectional relationship, Low-income families                                                                                                                                                                                                                                                                                                                                                                                                                                                                                                                                                                                                                                                                                                                                                                                                                                                                                                                                                                                                                                                        |
|                                 |                                                                                                                                                                                                                                                                                                                                                                                                                                                                                                                                                                                                                                                                                                                                                                                                                                                                                                                                                                                                                                                                                                                                                                       |

SCHOLARONE™  
Manuscripts

1  
2  
3  
4  
5  
6  
7  
8  
9  
10  
11  
12  
13  
14  
15  
16  
17  
18  
19  
20  
21  
22  
23  
24  
25  
26  
27  
28  
29  
30  
31  
32  
33  
34  
35  
36  
37  
38  
39  
40  
41  
42  
43  
44  
45  
46  
47  
48  
49  
50  
51  
52  
53  
54  
55  
56  
57  
58  
59  
60

For peer review only

**Title**

A prospective cohort study to investigate parental stress and child health in low-income Chinese families: protocol paper

**Authors:**

Rosa Sze Man **Wong**<sup>1</sup>, Esther Yee Tak **Yu**<sup>\*1</sup>, Vivian Yawei **Guo**<sup>1</sup>, Eric Yuk-Fai **Wan**<sup>1</sup>,  
Weng-Yee **Chin**<sup>1</sup>, Carlos King Ho **Wong**<sup>1</sup>, Colman Siu Cheung **Fung**<sup>1</sup>, Keith Tsz Suen **Tung**<sup>2</sup>,  
Wilfred Hing-Sang **Wong**<sup>2</sup>, Patrick **Ip**<sup>2</sup>, Agnes Fung Yee **Tiwari**<sup>3</sup> and Cindy Lo Kuen **Lam**<sup>1</sup>

<sup>1</sup> Department of Family Medicine and Primary Care, The University of Hong Kong, Hong Kong

<sup>2</sup> Department of Paediatrics and Adolescent Medicine, The University of Hong Kong, Hong Kong

<sup>3</sup> School of Nursing, Hong Kong Sanatorium & Hospital, Hong Kong

**\*Corresponding author:**

Dr. Esther Yee Tak Yu

Department of Family Medicine and Primary Care,

The University of Hong Kong,

3/F, Ap Lei Chau Clinic, 161 Ap Lei Chau Main Street, Ap Lei Chau, Hong Kong

Tel. (852) 2518 5658

Fax. (852) 2814 7475

E-mail address: ytyu@hku.hk

## Abstract

### Introduction

Chronic stress has adverse effects on health. Adults and children from low-income families are subject to multiple sources of stress. Existing literature about economic hardship mostly focuses on either adults or children but not both. Moreover, there is limited knowledge on the relationship between parental generalized stress and child health problems. This study aims to explore the bidirectional relationship between parental stress and child health in Chinese low-income families and to identify other modifiable factors influencing this relationship.

### Methods and analysis

This prospective cohort study will sample 254 low-income parent-child pairs and follow them up for 24 months with assessments at 3 time points (baseline, 12-, and 24-month) on parental stress, health-related quality of life (HRQOL), and child health and behavior using both subjective measures and objective physiological parameters. This study will collect data using standardized measures on HRQOL and behaviors of children as well as HRQOL, mental health and stress levels of parents along with physiological tests of allostatic load and telomere length. The mediating or moderating effect of family harmony, parenting style and neighborhood conditions will also be assessed. Data will be analyzed using latent growth modeling and cross-lagged path analysis modelling to examine the bidirectional effect of parental stress and child health over time. Mediation and moderation analysis will also be conducted to examine the mechanism by which the variables relate.

### Ethics and dissemination

This study was approved by the institutional review board of the University of Hong Kong – the Hospital Authority Hong Kong West Cluster, Reference number: UW 16-415. The study findings will be disseminated through peer-reviewed publications and international conferences.

**Trial registration number** ClinicalTrials.Gov: NCT03185273



**Strength and limitations of this study**

- This is a longitudinal study which allows for cause-effect relationships testing.
- The use of objective physiological parameters of children and parents will increase the reliability of the findings.
- This study will have only three measurement time points (baseline, 12- and 24-month).
- This study will use parent-proxy report of child health which may cause response bias.
- Study participants will be recruited from a community family support programme, which reduces the generalizability of our findings to other populations.

## Introduction

Poverty is inextricably related to ill health; both can be trans-generational.<sup>1</sup> Dealing with financial hardship can cause substantial stress and negatively affect health. The Americans' Changing Lives Study which involved 3,617 participants found that higher levels of parental stress were related to poorer self-rated health in parents.<sup>2</sup> Moreover, parental stress is a known risk factor for child maltreatment and family violence, both of which are increasing globally.<sup>3</sup> These early adverse events are detrimental to children's health and development. Recent research conducted in mainland China found that obesity prevalence was higher among children in wealthier families<sup>4</sup>, but the patterns were different in Hong Kong with higher rates of childhood obesity among lower income families.<sup>4,5</sup> Hong Kong, despite having a per-capita-gross-domestic-product (GDP) of HK\$273,550, has large income differences between rich and poor as reflected by a high Gini coefficient of 0.539 reported in 2016; approximately 20% of the population are living in poverty as defined by a monthly household income below half of the Hong Kong median.<sup>6</sup> It is widely accepted that population health tend to be worse in societies with greater income inequalities, and hence low-income families in these societies are particularly at risk of health problems.<sup>7</sup> In our previous study, children from Hong Kong Chinese low-income families experienced poorer health and more behavioral problems than other children in the population at similar age.<sup>8</sup> Adults from these families also reported poorer health-related quality of life (HRQOL),<sup>9</sup> with 6.1% of the parents having a known history of mental illness and 18.2% of them reporting elevated level of stress. Therefore, health problems (mental or physical) resulting from poverty is a significant public health issue and their prevention is urgent.

### *Psychosocial effects of stress on adults and children*

According to the Family Stress Model, parental stress impacts children's lives through disruptions in parenting skills and family relationships. The process starts from financial disadvantages causing pressure and stress which exacerbate family conflicts and increase poor parenting practices, ultimately leading to health and adjustment problems in children.<sup>10</sup> Moreover, family financial hardship has been associated with poorer social support and greater family tension,<sup>11</sup> which are known risk factors for mental health problems such as depression and anxiety. The resulting impairment in mental health not only disrupts interpersonal relationships among family members but also has negative impact on parenting. Family conflicts and aggressive and neglectful parenting practices are particularly harmful to

1  
2  
3 children's behavioral development, as conflicts and aggressive parenting behaviors can be  
4 observed and learned by their children. Children growing up in such aggressive families may  
5 believe that family aggression is acceptable and thus become more likely to behave in  
6 aggressive or harmful ways toward others.<sup>12 13</sup> On the other hand, neglectful parents tend to  
7 show minimal physical affection toward their children, know little about child development  
8 and have incompetent caretaking skills<sup>14</sup> which can put their children at a higher risk for  
9 obesity and other diseases. These childhood problems might in turn intensify feeling of  
10 distress in parents. The pathway linking children's problems to parental stress has been  
11 underexplored and thus warrants further investigations. Furthermore, despite growing  
12 empirical support for the Family Stress Model, such model is not static and more empirical  
13 evaluations are needed to identify risk and protective factors for changing the family stress  
14 process.<sup>15</sup>

#### 24 *Parental stress and its biological effects*

25 "Parental stress" refers to stress, defined as negative emotional experiences  
26 accompanied by predictable biochemical, physiological, cognitive, and behavioral changes  
27 directed either towards altering the stressful event or accommodating to its effects, which  
28 parents experience in general term.<sup>16</sup> Parental stress does not only result from child-rearing,  
29 but also from their social and environmental circumstances, responsibilities, and everyday  
30 life such as insufficient social support, financial challenges and heavy parenting  
31 responsibilities.<sup>17</sup> Under chronic stressful conditions, excessive strain on the body can cause  
32 cumulative damages to physiological systems (e.g. cardiovascular, metabolic, anthropometric,  
33 neuroendocrine and immune systems) which is often referred as allostatic load (AL).<sup>18</sup> Adults  
34 with high AL had been found to be more vulnerable to a number of physical, mental and  
35 behavioral disorders such as cardiovascular disease, depression and aggression.<sup>19</sup>

#### 45 *Biological effects of stress on child health*

46 According to the 2007 United Nations International Children's Emergency Fund  
47 (UNICEF) report, child health is a multidimensional construct that involves material  
48 well-being, health and safety, education, family and peer relationships, subjective well-being,  
49 behaviors and lifestyles.<sup>20</sup> Previous studies showed that adverse childhood experiences such  
50 as chronic family financial stress can cause impairments in these health dimensions by  
51 disrupting various physiological systems in children.<sup>21</sup> Poor child health in turn limits a  
52 child's potential to interact successfully with the environments.<sup>22</sup> However, traditional AL

1  
2  
3 markers cannot be easily measured in children because of the difficulty in blood sampling. To  
4 overcome this limitation, child health researchers have explored other noninvasive ways to  
5 collect biological samples from children for examination of objective physiological markers.  
6 An increasingly used method is to measure telomere length in children's buccal cells.  
7 Telomeres are essential components that protect the ends of chromosomes and shorten each  
8 time a cell divides. As a biomarker of cellular and biologic aging, telomere shortening is  
9 associated with a number of adverse health outcomes in adulthood. Previous studies on  
10 telomere length in children focused on severe environmental adversities in early childhood  
11 such as living in institutions<sup>23</sup> and prenatal tobacco exposure,<sup>24</sup> and demonstrated that adverse  
12 living environment led to telomere shortening in exposed children. Children with family  
13 adversity had been found to have shorter telomeres and greater cortisol reactivity to stress,<sup>25</sup>  
14 <sup>26</sup> which were associated with poorer health outcomes later in life.<sup>27</sup> At present, telomere  
15 length is regarded as a marker of stress exposure in children.<sup>27</sup> However, evidence on the long  
16 term impact of telomere shortening since early childhood on health in adulthood is not yet  
17 available and warrants further research.  
18  
19  
20  
21  
22  
23  
24  
25  
26  
27

### 28 *Relationship between parental stress and child health*

29  
30 Research evidence shows that maternal stressful experiences during pregnancy and in  
31 early postnatal period can lead to biological changes including neuroendocrine, epigenetic,  
32 and neuroanatomical changes in children,<sup>28</sup> thereby increasing their risk for health and  
33 behavioral problems later in life. On the other hand, more health and behavioral problems in  
34 children may add to greater parental stress due to more caregiving responsibilities. This can  
35 further damage the parent-child relationship. A bidirectional relationship between specific  
36 form of parental stress such as parenting stress and child behaviors has been documented in  
37 some studies.<sup>12 13</sup> But little is known about the relationship between general form of parental  
38 stress and child health. In addition, previous research has been largely unidirectional,  
39 assuming that parental stress damages child health. The opposite direction that children  
40 influence parental stress is possible but scarcely studied.  
41  
42  
43  
44  
45  
46  
47  
48  
49

### 50 *Potential mediators and moderators*

51 Despite the health risks of family financial hardship, certain individual and  
52 environmental factors might mitigate the negative consequences of growing up in a  
53 low-income household.<sup>27</sup> It has been posited that financial disadvantage is a risk factor for  
54 exposure to trauma and violence.<sup>1</sup> As illustrated in the Family Stress Model, low income can  
55  
56  
57  
58  
59  
60

1  
2  
3 induce pressure and stress which is associated with abusive parenting.<sup>29</sup> Different  
4 meta-analyses on childhood abusive experiences, particularly physical abuse, have found  
5 significantly shorter telomeres and more physical and mental health problems in abuse  
6 victims.<sup>30-32</sup> The Family Stress Model also emphasizes the importance of family relationship  
7 in children's lives. When financial pressure is high, financial hardship can exacerbate parental  
8 stress and increases conflicts and chaos in the family environment.<sup>33</sup> Children growing up in  
9 such hostile environment may have more behavioral problems<sup>34 35</sup> and a higher risk of  
10 obesity.<sup>36</sup> Furthermore, when children suffer health and behavioral problems, stressful  
11 parenting experiences can inflict other negative emotional symptoms such as anxiety and  
12 depression which may further exacerbate distress in parents<sup>37</sup>.

13  
14  
15  
16  
17  
18  
19  
20  
21 Although living on a low income can be stressful, many stressed parents are still able to  
22 provide adequate care to their children.<sup>38</sup> There is evidence that appropriate parenting  
23 behaviors such as use of reason rather than corporal punishment to discipline children can  
24 moderate the relationship between parenting stress and physical child abuse potential.<sup>39</sup>  
25 Many experts believe that authoritative parenting style is the most suitable parenting style in  
26 bringing up a child. Authoritative parenting practices are characterized by high  
27 responsiveness and reasonable demands such as setting concrete, age-appropriate  
28 expectations for children. Authoritative parenting style has been found to cause fewer  
29 behavioral and health problems in children<sup>40 41</sup>. In addition, neighborhood characteristics  
30 might also function to protect children against the negative consequences of parental stress.  
31 In cohesive neighborhoods where residents have a sense of trust and belongingness to each  
32 other, parents can seek support from their neighbors when they need help with childcare.  
33 Research show that more neighborhood cohesion predicts better development and behavioral  
34 outcomes in children.<sup>42</sup> Despite the established benefits, neither authoritative parenting style  
35 nor neighborhood cohesion has been studied as a moderator of the relationship between  
36 parental stress and child health.

### 47 48 *The present study*

49  
50 This study aims to explore whether there is a bi-directional relationship between  
51 parental stress and child health, and to examine the mediators and moderators of the  
52 relationship between parental stress and child health. The study conceptual model is shown in  
53 Figure 1. We hypothesize that there is a bi-directional relationship between parental stress  
54 and child health. We further hypothesize that family disharmony and child maltreatment are  
55  
56  
57  
58  
59  
60

mediators of the association between parental stress and child health, whereas authoritative parenting style and neighborhood cohesion are moderators of the association.

## Methods and analysis

### Study aims

- To estimate the prevalence of mild to high stress in low-income parents and the percentage of children with poorer HRQOL and more behavioral problems compared to the population norm.
- To examine the bidirectional relationship between parental stress and child health.
- To examine the correlation between changes in parental stress and changes in child health over time.
- To examine the associations between parents' perceived stress, HRQOL and allostatic load on the body.
- To examine the associations between children's HRQOL, behaviors, body mass index (BMI) z-score and telomere length.
- To identify the moderators and mediators of the relationship between parental stress and child health.

### Study design and setting

This is a prospective cohort study building upon an existing cohort study (main cohort study) on the effectiveness of the Trekkers Family Enhancement Scheme funded by a philanthropic foundation in Hong Kong (Kerry Group Kuok Foundation (Hong Kong) Limited).<sup>9 43</sup> This study will recruit parent-child pairs from low-income families and follow them up for 24 months with regular assessments on parental stress and child health using both subjective measures and objective physiological parameters. Additional data on HRQOL, family harmony, parenting style, neighborhood cohesion, and parental risk of child physical assault and neglect and mental health will also be collected at each assessment time point for testing mediating and moderating mechanisms between parental stress and child health. The baseline assessment will be conducted in 2016-17 with follow-up assessments at 12 and 24 months.

### Ethics

The ethics of this study has been approved by the institutional review board of the

University of Hong Kong – the Hospital Authority Hong Kong West Cluster, Reference number: UW 16-415.

### Sample size calculations

To examine the association of factors with outcomes, several rules of thumb have been proposed for calculation of the required sample size based on the number of factors including (i)  $10 \times (\text{number of factors})$ , (ii)  $50 + \text{number of factors}$  and (iii)  $50 + 8 \times (\text{number of factors})$ .<sup>44-46</sup> A total of 16 factors including the potential confounders will be involved in the current study. A range from 66 to 178 subjects based on these three rules of thumb will be needed. A previous study showed that rule (iii) is better than rule (i) and (ii) at 80% power and 5% level of significance if an moderate effect size of 0.3 is assumed.<sup>46</sup> Therefore, considering an effect size of 0.3 and an attrition rate of 30%, a minimum sample size of 254 parent-child pairs is needed to detect a moderate correlation between changes in parental stress and changes in child health over time at 80% power and 5% level of significance.

### Eligibility Criteria

Participants are parent-child pairs from low-income families. Each parent-child pair consists of an index child (i.e. the child agreeing to take part in cognitive assessment on recruitment) and his/her primary custodial parent (i.e. the parent spending a majority of the time with the index child). The participants also need to satisfy the following inclusion criteria and without any exclusion criteria:

#### *Inclusion criteria:*

- Family monthly household income does not exceed 75% of Hong Kong's median monthly household income; and
- At least one parent and one child aged 6 to 18 years of the same family have given consent to participate in the main cohort study.<sup>9 43</sup>

#### *Exclusion criteria:*

- Parents cannot speak or read Chinese;
- Children were born prematurely and/or with a congenital deformity; and
- Neither parent is the primary caregiver of the child.

### Recruitment

We will approach eligible participants in the main cohort study by telephone or during

1  
2  
3 face-to-face sessions. A research assistant will inform eligible participants about the study  
4 and will obtain information and signed consent from those who express interest in study  
5 participation. After providing consent, the parent of each participating parent-child pair will  
6 spend 45-60 minutes to complete a set of structured and standardized questionnaires on  
7 parental mental health and HRQOL, parenting style, their children's well-being and behaviors,  
8 and family and neighborhood environment. The questionnaires had been pilot-tested in  
9 several low-income parents and minor editing was done to ensure the questionnaires are  
10 comprehensible to the respondents. The questionnaires will be administered in two separate  
11 batches (the first includes parent and child measures and the second includes family and  
12 neighborhood measures). They will be administered by trained interviewers by face-to-face  
13 interview or telephone. If the parent cannot answer all the questionnaire items within one  
14 telephone interview or face-to-face session, the remaining unanswered items can be  
15 completed in next telephone interview session or self-completed at home and returned to the  
16 research office using our prepaid envelope. Physical examination on both the parent and child  
17 will include blood pressure, heart rate, weight, height, and waist-to-hip ratio. Each child will  
18 have a buccal cell swab taken for measurement of their telomere length, and each adult will  
19 have a 15ml of venous blood sample taken for fasting glucose test, glycosylated haemoglobin  
20 test, and full lipid profile test.  
21  
22  
23  
24  
25  
26  
27  
28  
29  
30  
31  
32

### 33 **Assessment procedure**

34  
35 This study will have three assessment waves: T1 Baseline, T2 follow up (12 months),  
36 and T3 follow up (24 months). Table 1 shows the measurement and time points at which data  
37 will be collected.  
38  
39

40 Physical health data and biological samples will be collected by research nurses and  
41 research assistants during health assessment session held in community centers.  
42 Questionnaire data will be collected by trained interviewers during a telephone survey. To  
43 minimize attrition, a package of questionnaires and a sheet of instructions and equipment (i.e.  
44 brushes) for swab-taking at home may also be sent to parents upon request. Parent-child pairs  
45 will be reimbursed HK\$50 (US\$6.4) for the baseline and HK\$100 (US\$12.8) for the  
46 12-month and 24-month assessment.  
47  
48  
49  
50  
51  
52  
53  
54  
55  
56  
57  
58  
59  
60



**Table 1. Measures, tools and time-points for data collection**

|                                                       | Baseline |        | 12-month follow-up |        | 24-month follow-up |        |
|-------------------------------------------------------|----------|--------|--------------------|--------|--------------------|--------|
|                                                       | Child    | Parent | Child              | Parent | Child              | Parent |
| <b>Social-economic status</b>                         |          |        |                    |        |                    |        |
| Age                                                   | x        | x      |                    |        |                    |        |
| Gender                                                | x        | x      |                    |        |                    |        |
| Marital Status                                        |          | x      |                    |        |                    |        |
| Education Background                                  |          | x      |                    |        |                    |        |
| Occupation                                            |          | x      |                    |        |                    |        |
| Monthly Household Income                              |          | x      |                    | x      |                    | x      |
| Immigration Status                                    |          | x      |                    |        |                    |        |
| Smoking/Drinking/Illicit Drug Use                     |          | x      |                    |        |                    |        |
| <b>Health, Cognitive and Psychosocial Assessments</b> |          |        |                    |        |                    |        |
| SDQ                                                   | x        |        | x                  |        | x                  |        |
| CHQ                                                   | x        |        | x                  |        | x                  |        |
| WISC-IV-HK-SF                                         | x        |        |                    |        |                    |        |
| DASS                                                  |          | x      |                    | x      |                    | x      |
| PHQ-9                                                 |          | x      |                    | x      |                    | x      |
| SF-12v2                                               |          | x      |                    | x      |                    | x      |
| Co-morbidities                                        | x        | x      | x                  | x      | x                  | x      |
| <b>Family and Neighborhood</b>                        |          |        |                    |        |                    |        |
| FHS-5                                                 |          |        |                    | x      |                    | x      |
| Authoritative Parenting Style subscale of PSDQ        |          |        |                    | x      |                    | x      |
| NCES                                                  |          |        |                    | x      |                    | x      |
| Child Physical Assault and Neglect subscale of CTSPC  |          |        |                    | x      |                    | x      |
| <b>Physical Assessments</b>                           |          |        |                    |        |                    |        |
| Weight and Height                                     | x        | x      | x                  | x      | x                  | x      |
| Waist Circumference and Hip Circumference             | x        | x      | x                  | x      | x                  | x      |
| Blood Pressure and Heart Rate                         | x        | x      | x                  | x      | x                  | x      |
| <b>Laboratory Tests</b>                               |          |        |                    |        |                    |        |
| Fasting Blood Glucose                                 |          | x      |                    | x      |                    | x      |

|                                                                          |   |   |  |   |   |   |
|--------------------------------------------------------------------------|---|---|--|---|---|---|
| Glycated Haemoglobin                                                     |   | x |  | x |   | x |
| Lipid Profile (Total Cholesterol, HDL and LDL Cholesterol, Triglyceride) |   | x |  | x |   | x |
| Telomere Length                                                          | x |   |  |   | x |   |

**Abbreviations:** CHQ: Child Health Questionnaire; CTSPC: Parent Child Conflict Tactics Scale; DASS: Depression Anxiety Stress Scales; FHS: Family Harmony Scale; HDL: High-density lipoprotein; LDL: Low-density lipoprotein; PHQ: Patient Health Questionnaire; PSDQ: Parenting Style and Dimension Questionnaire; NCES: Neighborhood Collective Efficacy Scale; SDQ: Strength and Difficulties Questionnaire; SF-12v2: Short-Form Health Survey – the second version; WISC-IV-HK-SF: Wechsler Intelligence Scale for Children – Hong Kong (Short Form)

### Maintenance Strategies

This study will recruit participants from the main cohort study, which aims to evaluate the effectiveness of a Family Enhancement Scheme for a group of low-income families by comparing the health outcomes of the intervention and control groups.<sup>9</sup> The intervention group has been enrolled in the Family Enhancement Scheme since 2012 and has agreed to take part in a 15-year project. These participants are engaged through regular contacts at various family enhancement interventions and are supportive of related research activities. Control families with similar socio-economical background have been recruited by our research team and have agreed to be followed up for at least 5 years. To improve retention, free health assessments and incentives will be offered at each data collection time point. This strategy serves to attract low-income families who only have limited access to preventive health services, as most of these services are currently only offered in the private healthcare sector in Hong Kong. To maximize the sample size of this study, we will recruit all eligible parent-child pairs from intervention or control families of the Family Enhancement Scheme project. The potential grouping effect will be adjusted in the data analyses.

### Study instrument and measures

#### Child health

Child Health Questionnaire – Parent Form 50 (CHQ-PF50) is a parent proxy measure of children's physical and psychological wellbeing, with 50 items grouped into 12 multi-item

1  
2  
3 subscales. The tool has good psychometric properties with Cronbach's alpha coefficient  
4 ranging from 0.66 to 0.94<sup>47</sup>. Its Chinese version has been used in local Chinese children.<sup>43 48</sup>  
5  
6

7  
8 Strength and Difficulties Questionnaire (SDQ) is a 25-item parent-completed questionnaire  
9 measuring children's behavioral issues. The SDQ, with 5 subscales, has been translated into  
10 traditional Chinese and tested with satisfactory reliability (Cronbach's alpha: 0.66 to 0.81)  
11 and validity in local children.<sup>43 49</sup>  
12  
13

14  
15  
16 Telomere length: DNA will be extracted from buccal epithelial cells. Telomere length will be  
17 measured by the method adapted from that originally published by Cawthon.<sup>50</sup> For each  
18 sample, the telomere length will be represented by the relative ratio of the telomere repeat  
19 copy number (T) to the single copy gene 36BA copy number (S). The T/S ratio will be  
20 determined by quantitative polymerase chain reaction (qPCR) using a 7900HT Thermocycler  
21 (Applied Biosystems). The quality of extracted DNA, as indicated by the value  
22 of A260/A280 ratio, will be determined by using the NanoDrop 2000c spectrophotometer  
23 (Thermo Scientific).  
24  
25  
26  
27  
28

29  
30 BMI z-score: As BMI (calculated as weight/height<sup>2</sup>) changes rapidly in childhood, and  
31 growth patterns differ between boys and girls, BMI will be converted to z-score based on the  
32 international child growth reference.<sup>51</sup> This method allows for direct comparison of BMI and  
33 its changes across different ages and genders.  
34  
35  
36  
37

### 38 Parental health

39  
40 Mental health: Depression Anxiety Stress Scale (DASS) has 3 subscales, each with 7 items  
41 rating the severity/frequency of symptoms of stress, anxiety and depression respectively. The  
42 total score of each dimension can be categorized as "normal", "mild", "moderate", "severe",  
43 and "extremely severe", according to the DASS manual<sup>52</sup>. DASS also has well-established  
44 psychometric properties<sup>52</sup> and been validated in Chinese population (Cronbach's alpha: 0.80  
45 to 0.82).<sup>53</sup>  
46  
47  
48  
49  
50

51  
52 Quality of life: The SF-12 Health Survey-Version 2 (SF-12v2) is a 12-item quality of life  
53 assessment instrument, producing 8 subscales and 2 composite summary scores. The Chinese  
54 version of SF-12v2 has been validated and normed in local Chinese population with  
55 Cronbach's alpha coefficient ranging from 0.60 to 0.89.<sup>43 54 55</sup>  
56  
57  
58

1  
2  
3  
4 Allostatic load index: A review of literature has identified a set of physiological parameters  
5 that can reflect AL and yet be conveniently measured, including blood pressure, heart rate,  
6 BMI, waist-to-hip ratio, lipid profile, fasting glucose and glycosylated haemoglobin.<sup>18</sup> This  
7 set of physiological parameters will be measured and included in the calculation of AL index  
8 in this study. An index score of AL is calculated by summing the number of parameters that  
9 fall into the abnormality category defined by local clinical practice guidelines.  
10  
11  
12  
13  
14

15  
16 Screening for depression: Patient Health Questionnaire – 9 (PHQ – 9) is used to screen for  
17 depression in the parents. The Chinese version of PHQ-9 has been validated and used in  
18 previous local studies (Cronbach’s alpha: 0.82).<sup>43</sup>  
19  
20  
21

### 22 Family and neighborhood environment

23  
24 Family environment: The Chinese version of Family Harmony Scale – 5 (FHS-5) will be  
25 used to measure family harmony (Cronbach’s alpha: 0.92).<sup>56</sup> Parental risk of physically  
26 abusing and neglecting children as well as their parenting style will also be assessed with the  
27 Child Physical Assault and Neglect subscale of the Parent Child Conflict Tactics Scale  
28 (CTSPC) (Cronbach’s alpha: 0.77 to 0.88)<sup>57</sup> and the Authoritative Parenting Style subscale  
29 of the Parenting Style and Dimension Questionnaire (PSDQ) (Cronbach’s alpha: 0.71 to  
30 0.97),<sup>58 59</sup> respectively.  
31  
32  
33  
34  
35

36  
37 Neighborhood: The Chinese version of Neighborhood Collective Efficacy Scale (NCES) is a  
38 10-item scale, with five items each on informal social control and social cohesion  
39 (Cronbach’s alpha: 0.63).<sup>60</sup>  
40  
41  
42

43  
44 The following socio-demographic characteristics will be considered to be potential  
45 confounding factors on the basis of their potential associations with parental stress and child  
46 health: household income, children’s age and gender, and parental age and gender, education  
47 level, occupation, marital status, and immigration status. Parental history of smoking,  
48 drinking and illicit drug use, occupation and marital status, comorbidities of parents and  
49 children, and household income will be recorded at baseline and follow-ups. The cognitive  
50 abilities of the child from each household were assessed by a clinical psychologist using the  
51 Wechsler Intelligence Scale for Children Fourth Edition – Hong Kong (Short Form)  
52 (WISC-IV-HK-SF) at the time of enrollment into the main cohort study. Data on such  
53  
54  
55  
56  
57  
58  
59  
60

1  
2  
3 estimation of intelligence quotient (I.Q.) of the children will be retrieved and used as a  
4 confounder in the study.  
5  
6

### 7 8 **Data processing and analysis**

9  
10 Descriptive statistics will be used to summarize the characteristics of parents and  
11 children at baseline and each follow-up time point. Parents with a cut-off score of  $\geq 15$  in  
12 stress dimension of DASS will be considered as having at least mild stress as referenced by  
13 the DASS manual<sup>52</sup>. Missing data will be handled using full information maximum  
14 likelihood in the estimation of path models. This method is robust against biases from data  
15 missing at random (MAR). Latent growth modelling will be conducted to obtain how the  
16 parental stress and child health changes over times. The bidirectional relationship between  
17 parental stress and child health over times will be determined using cross-lagged path model  
18 (Figure 2).<sup>13</sup> Mediation and moderation analysis will also be conducted to map out the  
19 mechanism by which the variables relate. All analyses will control for a range of confounding  
20 factors with the following variables as outcomes/mediators/moderators:  
21  
22  
23  
24  
25  
26

#### 27 *Primary exposures/outcomes*

- 28 • Child CHQ General Health Perceptions subscale score
- 29 • Parental DASS Stress subscale score
- 30
- 31

#### 32 *Secondary outcomes*

- 33 • Child SDQ Total Difficulty score
- 34 • Child DNA telomere length
- 35 • Child BMI z-score
- 36 • Parental allostatic load index
- 37 • Parental SF-12v2 HRQOL scores
- 38
- 39
- 40
- 41

#### 42 *Mediators of the relationship between parental stress and child health*

- 43 • Parental mental health: depression (PHQ-9 score), DASS Depression and Anxiety  
44 subscale score
- 45 • Family disharmony measured by FHS-5
- 46 • Child physical assault and neglect potential measured by the Physical Assault and  
47 Neglect subscale of the CTSPC
- 48
- 49
- 50
- 51

#### 52 *Moderators of the relationship between parental stress and child health*

- 53 • Authoritative parenting style measured by the Authoritative Parenting Style subscale of  
54 the PSDQ
- 55
- 56
- 57
- 58
- 59
- 60

- Neighbourhood cohesion measured by NCES

Potential confounders include sociodemographic information (parental age and gender, child age and gender, household income, parental occupation, and marital status), parental history of smoking, drinking and illicit drug use, parental and child history of comorbidities and child cognitive skills. All statistical analyses will be performed using IBM SPSS Statistics and Mplus. All significance tests will be two-tailed, and those findings with a p-value less than 0.05 will be considered statistically significant.

## Discussion

Chronic exposure to stressors and dangers of poverty can have a detrimental impact on the health of parents and their children. It is important to mitigate the effect of poverty through protective mechanisms, the development of which should be guided by empirical evidence. Although it is known that poverty and poor health are linked with each other, the present research, with an aim to elucidate the relationship between parental stress and child health in low-income families, will give further insights into the possible vicious cycle of ill health between parents and children, an aspect that is often overlooked. For example, the question of whether changes in parental stress correlate with changes in child health over time and its magnitude will be investigated. The result will inform various stakeholders about the potential of improvement through interventions on parental stress and child health.

In addition to parent-proxy reports of children's general health, measurement of telomere length in children will provide more convincing evidence on the biological health of the children at cellular level. We will also measure child BMI z-score which is a recognized indicator of child health to reflect the growth of the children. The results will help to establish the robustness of assessing child general health using parent-proxy report and/or telomere length as a measure of child health for either clinical use or future research purposes. Moreover, parental allostatic load index will also be studied in this research. The index represents the sum of physiological dysregulations in the body of an individual in response to chronic stressful situation prior to onset of medical illnesses, and is measured by a combination of biomarkers of health such as adiposity, blood pressure and plasma glucose level. The total "stress load" is presented as a composite score, the allostatic load index, which predicts morbidity and mortality.<sup>19</sup> These results will provide the public with evidence of the biological impact of perceived stress on parents.

1  
2  
3  
4  
5  
6  
7  
8  
9  
10  
11  
12  
13  
14  
15  
16  
17  
18  
19  
20  
21  
22  
23  
24  
25  
26  
27  
28  
29  
30  
31  
32  
33  
34  
35  
36  
37  
38  
39  
40  
41  
42  
43  
44  
45  
46  
47  
48  
49  
50  
51  
52

Furthermore, this study will examine the mediators of the parent-child health relationship. The findings would inform healthcare providers and policy makers on the potential targets for intervention to improve both parental and child health (e.g. interventions for intimate partner abuse and family disharmony, or enhanced care for depression and anxiety). On the other hand, moderation analysis will focus on authoritative parenting style and neighbourhood cohesion. These two factors were selected because of their potentials for improvement through interventions, e.g. parenting skill training and community fun day, which deem feasible and may benefit the whole community. For policy makers, the results could be useful for informing the design of a holistic approach to address children's health issues and parental stress. Ultimately, targeted interventions at risk factors identified by this study can be developed at the community level to improve the health of parents and children of low-income families.

25  
26  
27  
28  
29  
30  
31  
32  
33  
34  
35  
36  
37  
38  
39  
40  
41  
42  
43  
44  
45  
46  
47  
48  
49  
50  
51  
52

This study has several strengths and limitations. Some children in this study are quite young and may not be able to give reliable information on their own health status. Children's HRQOL and behaviors will therefore be proxy-reported by their parents. Despite this limitation, this study not only assesses participants' perceived health status but also uses objective measures such as telomere length measurement and allostatic load index calculation to give a holistic view of the health conditions of study participants. The inclusion of both objective and participant-reported outcomes can increase the reliability of the findings by reducing response bias. In addition, this study provides longitudinal data which make it possible to examine cause-effect relationships between variables. The results will be useful to advance our understanding of the linkage between parental and child health. However, this study focuses on a subgroup of low-income families in Hong Kong which is not a population-representative sample and hence the findings may not be generalizable to other populations. Moreover, in order to reduce the respondent burden (and improve the response rate) in the completion of a large number of questionnaires, the outcomes will be measured only at three time points. Further follow-up assessment should be conducted if resources are available.

### 53 **Ethics and dissemination**

54  
55  
56  
57  
58  
59  
60

This study was approved by the institutional review board of the University of Hong Kong – the Hospital Authority Hong Kong West Cluster, Reference number: UW 16-415. The study

1  
2  
3 findings will be disseminated through peer-reviewed publications and international  
4 conferences.  
5  
6  
7  
8  
9  
10  
11  
12  
13  
14

## 15 **References**

- 16 1. Santiago CD, Kaltman S, Miranda J. Poverty and Mental Health: How Do Low-Income  
17 Adults and Children Fare in Psychotherapy? *Journal of Clinical Psychology*  
18 2013;69(2):115-26.
- 19 2. Lantz PM, House JS, Mero RP, et al. Stress, Life Events, and Socioeconomic Disparities in  
20 Health: Results from the Americans' Changing Lives Study. *Journal of health and*  
21 *social behavior* 2005;46(3):274-88.
- 22 3. Guedes A, Bott S, Garcia-Moreno C, et al. Bridging the gaps: a global review of  
23 intersections of violence against women and violence against children. *Global health*  
24 *action* 2016;9(1):31516.
- 25 4. He W, James SA, Merli MG, et al. An increasing socioeconomic gap in childhood  
26 overweight and obesity in China. *American journal of public health*  
27 2014;104(1):e14-e22.
- 28 5. Ip P, Ho FKW, So H-K, et al. Socioeconomic gradient in childhood obesity and hypertension:  
29 A multilevel population-based study in a Chinese community. *PloS one*  
30 2016;11(6):e0156945.
- 31 6. The Government of the Hong Kong Special Administrative Region. Hong Kong Poverty  
32 Situation Report 2013. 2013:169.
- 33 7. Subramanian SV, Kawachi I. Income inequality and health: what have we learned so far?  
34 *Epidemiologic reviews* 2004;26(1):78-91.
- 35 8. Wong RSM, Guo VY, Ip P, et al. Mothers' health-related quality of life: its relationship with  
36 children's health-related quality of life and behavior in low income families. *Family*  
37 *Medicine and Community Health* 2016 4(4):4-12.
- 38 9. Lam CLK, Guo VY, Wong CKH, et al. Poverty and health-related quality of life of people  
39 living in Hong Kong: comparison of individuals from low-income families and the  
40 general population. *J Public Health (Oxf)* 2017;39(2):258-65. doi:  
41 10.1093/pubmed/fdw046
- 42 10. Conger RD, Wallace LE, Sun Y, et al. Economic pressure in African American families: a  
43 replication and extension of the family stress model. *Developmental psychology*  
44  
45  
46  
47  
48  
49  
50  
51  
52  
53  
54  
55  
56  
57  
58  
59  
60



- 2002;38(2):179-93.
11. Evans GW, Kim P. Childhood poverty, chronic stress, self-regulation, and coping. *Child Development Perspectives* 2013;7(1):43-48.
  12. Neece CL, Green SA, Baker BL. Parenting stress and child behavior problems: A transactional relationship across time. *American Journal on Intellectual and Developmental Disabilities* 2012;117(1):48-66.
  13. Stone LL, Mares SH, Otten R, et al. The Co-Development of Parenting Stress and Childhood Internalizing and Externalizing Problems. *Journal of Psychopathology and Behavioral Assessment* 2016;38(1):78-86.
  14. Slack KS, Holl JL, McDaniel M, et al. Understanding the risks of child neglect: An exploration of poverty and parenting characteristics. *Child maltreatment* 2004;9(4):395-408.
  15. Masarik AS, Conger RD. Stress and child development: A review of the Family Stress Model. *Current Opinion in Psychology* 2017;13:85-90.
  16. Cronin S, Becher E, Christians KS, et al. Parents and stress: Understanding experiences, context, and responses: St. Paul, MN: University of Minnesota Extension, Children, Youth and Family Consortium 2015.
  17. Belsky J. The determinants of parenting: A process model. *Child development* 1984;55(1):83-96.
  18. Juster R-P, McEwen BS, Lupien SJ. Allostatic load biomarkers of chronic stress and impact on health and cognition. *Neuroscience & Biobehavioral Reviews* 2010;35(1):2-16.
  19. McEwen BS. Allostasis and allostatic load: implications for neuropsychopharmacology. *Neuropsychopharmacology* 2000;22(2):108-24.
  20. UNICEF (United Nations Children's Fund). Child poverty in perspective: An overview of child well-being in rich countries. Innocenti Report Card 7. Florence, Italy: UNICEF Innocenti Research Centre, 2007.
  21. Luecken LJ, Lemery KS. Early caregiving and physiological stress responses. *Clinical psychology review* 2004;24(2):171-91.
  22. National Research Council. Children's health, the Nation's wealth: assessing and improving child health. *National Academic Press* 2004
  23. Drury SS, Theall K, Gleason MM, et al. Telomere length and early severe social deprivation: linking early adversity and cellular aging. *Molecular psychiatry* 2012;17(7):719-27.
  24. Ip P, Chung BHY, Ho FKW, et al. Prenatal tobacco exposure shortens telomere length in children. *Nicotine & Tobacco Research* 2017;19(1):111-18.
  25. Asok A, Bernard K, Roth T, et al. Parental responsiveness moderates the association between early-life stress and reduced telomere length. *Development and psychopathology* 2013;25(3):577-85.

- 1
- 2
- 3 26. Gotlib I, LeMoult J, Colich N, et al. Telomere length and cortisol reactivity in children of
- 4 depressed mothers. *Molecular psychiatry* 2015;20(5):615-20.
- 5
- 6 27. Theall KP, Brett ZH, Shirtcliff EA, et al. Neighborhood disorder and telomeres: Connecting
- 7 children's exposure to community level stress and cellular response. *Social Science &*
- 8 *Medicine* 2013;85:50-58.
- 9
- 10 28. Bowers ME, Yehuda R. Intergenerational Transmission of Stress in Humans.
- 11 *Neuropsychopharmacology* 2016;41(1):232-44.
- 12
- 13 29. Rodriguez CM, Green AJ. Parenting stress and anger expression as predictors of child
- 14 abuse potential. *Child Abuse & Neglect* 1997;21(4):367-77.
- 15
- 16 30. Ridout K, Levandowski M, Ridout S, et al. Early life adversity and telomere length: a
- 17 meta-analysis. *Molecular psychiatry* 2017 doi: 10.1038/mp.2017.26
- 18
- 19 31. Norman RE, Byambaa M, De R, et al. The long-term health consequences of child
- 20 physical abuse, emotional abuse, and neglect: a systematic review and meta-analysis.
- 21 *PLoS medicine* 2012;9(11):e1001349.
- 22
- 23 32. Ip P, Wong RS, Li SL, et al. Mental health consequences of childhood physical abuse in
- 24 Chinese populations: a meta-analysis. *Trauma, Violence, & Abuse* 2016;17(5):571-84.
- 25
- 26 33. Conger RD, Conger KJ, Martin MJ. Socioeconomic status, family processes, and individual
- 27 development. *Journal of Marriage and Family* 2010;72(3):685-704.
- 28
- 29 34. Katz LF, Woodin EM. Hostility, hostile detachment, and conflict engagement in marriages:
- 30 Effects on child and family functioning. *Child development* 2002;73(2):636-52.
- 31
- 32 35. Guo VY, Yu EYT, Wong RSM, et al. Maternal mental quality of life mediates the
- 33 associations between intimate partner abuse against mothers and their children's
- 34 behaviours and quality of life in low-income Chinese families. *Quality of Life Research*
- 35 2017;26(12):3297-306. doi: 10.1007/s11136-017-1664-8
- 36
- 37 36. Halliday JA, Palma CL, Mellor D, et al. The relationship between family functioning and
- 38 child and adolescent overweight and obesity: a systematic review. *International*
- 39 *journal of obesity* 2014;38(4):480-93. doi: 10.1038/ijo.2013.213
- 40
- 41 37. Cousino MK, Hazen RA. Parenting Stress Among Caregivers of Children With Chronic
- 42 Illness: A Systematic Review. *Journal of Pediatric Psychology* 2013;38(8):809-28. doi:
- 43 10.1093/jpepsy/jst049
- 44
- 45 38. Egeland BR, Breitenbucher M, Rosenberg D. Prospective study of the significance of life
- 46 stress in the etiology of child abuse. *Journal of Consulting and Clinical Psychology*
- 47 1980;48(2):195-205.
- 48
- 49 39. Crouch JL, Behl LE. Relationships among parental beliefs in corporal punishment,
- 50 reported stress, and physical child abuse potential. *Child Abuse & Neglect*
- 51 2001;25(3):413-19. doi: [https://doi.org/10.1016/S0145-2134\(00\)00256-8](https://doi.org/10.1016/S0145-2134(00)00256-8)
- 52
- 53 40. Pinquart M, Kauser R. Do the Associations of Parenting Styles With Behavior Problems
- 54 and Academic Achievement Vary by Culture? Results From a Meta-Analysis. *Cultural*
- 55
- 56
- 57
- 58
- 59
- 60

- 1  
2  
3 *Diversity and Ethnic Minority Psychology* 2017 doi: 10.1037/cdp0000149
- 4 41. Sokol RL, Qin B, Poti J. Parenting styles and body mass index: a systematic review of  
5 prospective studies among children. *Obesity Reviews* 2017;18(3):281-92.
- 6 42. Minh A, Muhajarine N, Janus M, et al. A review of neighborhood effects and early child  
7 development: How, where, and for whom, do neighborhoods matter? *Health & Place*  
8 2017;46:155-74.
- 9 43. Fung CSC, Yu EYT, Guo VY, et al. Development of a Health Empowerment Programme to  
10 improve the health of working poor families: protocol for a prospective cohort study  
11 in Hong Kong. *BMJ open* 2016;6(2):e010015.
- 12 44. Cohen J. Statistical power analysis for the behavior science. *Lawrance Erlbaum*  
13 *Association* 1988
- 14 45. Harris RJ. A primer of multivariate statistics: Psychology Press 2001.
- 15 46. Green SB. How many subjects does it take to do a regression analysis. *Multivariate*  
16 *behavioral research* 1991;26(3):499-510.
- 17 47. Landgraf JM, Abetz L, Ware JE. Child Health Questionnaire (CHQ): A user's manual:  
18 Health Institute, New England Medical Center Boston 2013.
- 19 48. Lee S, Cheung Y, Wong H, et al. Chronic health problems and health-related quality of life  
20 in Chinese children and adolescents: a population-based study in Hong Kong. *BMJ*  
21 *open* 2013;3(1):e001183.
- 22 49. Lai KY, Luk ES, Leung PW, et al. Validation of the Chinese version of the strengths and  
23 difficulties questionnaire in Hong Kong. *Social psychiatry and psychiatric*  
24 *epidemiology* 2010;45(12):1179-86.
- 25 50. Cawthon RM. Telomere measurement by quantitative PCR. *Nucleic acids research*  
26 2002;30(10):e47-e47.
- 27 51. Dinsdale H, Ridler C, Ells L. A simple guide to classifying body mass index in children.  
28 *National Obesity Observatory, Oxford* 2011
- 29 52. Lovibond PF, Lovibond SH. The structure of negative emotional states: Comparison of the  
30 Depression Anxiety Stress Scales (DASS) with the Beck Depression and Anxiety  
31 Inventories. *Behaviour research and therapy* 1995;33(3):335-43.
- 32 53. Wang K, Shi H-S, Geng F-L, et al. Cross-cultural validation of the Depression Anxiety  
33 Stress Scale-21 in China. *Psychological assessment* 2016;28(5):e88-e100.
- 34 54. Lam C, Wong C, Lam E, et al. Population norm of Chinese (HK) SF-12 health  
35 survey-version 2 of Chinese adults in Hong Kong. *Hong Kong Practitioner*  
36 2010;32(2):77-86.
- 37 55. Lam ET, Lam CL, Fong DY, et al. Is the SF-12 version 2 Health Survey a valid and equivalent  
38 substitute for the SF-36 version 2 Health Survey for the Chinese? *Journal of*  
39 *evaluation in clinical practice* 2013;19(1):200-08.
- 40 56. Kavikondala S, Stewart SM, Ni MY, et al. Structure and Validity of Family Harmony Scale:
- 41  
42  
43  
44  
45  
46  
47  
48  
49  
50  
51  
52  
53  
54  
55  
56  
57  
58  
59  
60

- 1  
2  
3 An Instrument for Measuring Harmony. *Psychological assessment* 2016;28(3):307-18.
- 4 57. Chan KL, Brownridge DA, Fong DY, et al. Violence against pregnant women can increase  
5 the risk of child abuse: a longitudinal study. *Child abuse & neglect* 2012;36(4):275-84.
- 6 58. Wu P, Robinson CC, Yang C, et al. Similarities and differences in mothers' parenting of  
7 preschoolers in China and the United States. *International Journal of Behavioral*  
8 *Development* 2002;26(6):481-91.
- 9 59. Olivari MG, Tagliabue S, Confalonieri E. Parenting Style and Dimensions Questionnaire: A  
10 review of reliability and validity. *Marriage & Family Review* 2013;49(6):465-90.
- 11 60. Chou K-L. Perceived discrimination and depression among new migrants to Hong Kong:  
12 The moderating role of social support and neighborhood collective efficacy. *Journal*  
13 *of affective disorders* 2012;138(1):63-70.
- 14  
15  
16  
17  
18  
19  
20  
21  
22  
23

#### 24 **Acknowledgements**

25  
26 We are most grateful to Kerry Group Kuok Foundation (Hong Kong) Limited (KGKF) for  
27 their support. We thank the Neighborhood Advice-Action Council (NAAC) and Yat Tung (I/II)  
28 Estate Property Management in providing venue for our study. A special thanks to Versitech  
29 Ltd for granting us a complementary license to use the OPine Software for data collection in  
30 our study. The timely completion of the telephone surveys by the HKU Social Science  
31 Research Center is much appreciated. The hard work of our research staff in data collection  
32 and analysis must be acknowledged.

33  
34  
35  
36  
37  
38  
39  
40  
41  
42

#### 43 **Contributions**

44  
45 RSMW, EYTY and CLKL conceived the study concept, developed the funding proposal and  
46 applied for funding. RSMW, EYTY, VYG, CKHW, CSCF coordinates the project. EYFW  
47 and CKHW developed the statistical analysis plan, and contributed to the interpretation of  
48 data. KTST and WHSW provided input regarding the telomere length assay and  
49 interpretation aspects of the study. WYC, PI, AFYT provided expert opinion in mental health,  
50 child development and family relationship aspects of the protocol respectively. CLKL is the  
51  
52  
53  
54  
55  
56  
57  
58  
59  
60

1  
2  
3 funding holder of the community family support programme for low-income families in  
4 Hong Kong funded by a philanthropic foundation in Hong Kong (Kerry Group Kuok  
5 Foundation (Hong Kong) Limited). EYTY is the principal investigator and the grant holder of  
6 the Health and Medical Research Fund of Hong Kong (HMRF/14151571). RSMW, EYTY  
7 and CLKL initiated the writing of the protocol paper. All authors revised and approved the  
8 final version of the manuscript.  
9  
10  
11  
12  
13  
14  
15

### 16 17 18 **Funding**

19  
20 This study was supported by Kerry Group Kuok Foundation (Hong Kong) Limited and the  
21 Health and Medical Research Fund of Hong Kong (HMRF/14151571).  
22  
23  
24  
25

### 26 27 **Competing interests**

28 The authors declare no conflict of interest.  
29  
30  
31  
32  
33  
34

### 35 36 **Figure legend**

37 **Figure 1.** Study conceptual model. Potential confounders include baseline sociodemographic  
38 information (parental age and gender, child age and gender, household income, parental  
39 occupation, and marital status), parental history of smoking, drinking and illicit drug use,  
40 parental and child history of comorbidities and child cognitive skills.  
41  
42  
43  
44

45 **Figure 2.** Hypothesized cross-lagged path model predicting child health and parental stress  
46 from baseline to 24-months follow-up.  
47  
48  
49  
50  
51  
52  
53  
54  
55  
56  
57  
58  
59  
60

1  
2  
3  
4  
5  
6  
7  
8  
9  
10  
11  
12  
13  
14  
15  
16  
17  
18  
19  
20  
21  
22  
23  
24  
25  
26  
27  
28  
29  
30  
31  
32  
33  
34  
35  
36  
37  
38  
39  
40  
41  
42  
43  
44  
45  
46  
47  
48  
49  
50  
51  
52  
53  
54  
55  
56  
57  
58  
59  
60

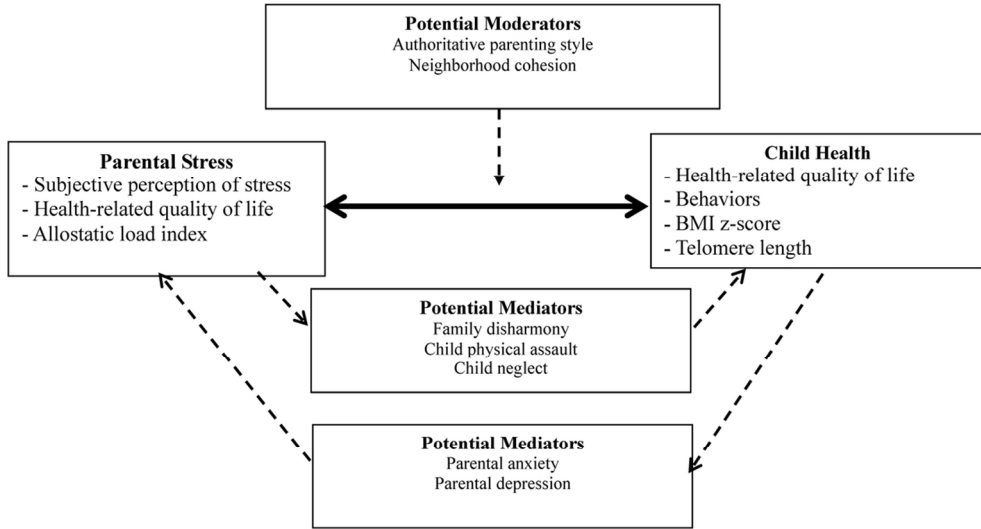

Figure 1. Study conceptual model. Potential confounders include baseline sociodemographic information (parental age and gender, child age and gender, household income, parental occupation, and marital status), parental history of smoking, drinking and illicit drug use, parental and child history of comorbidities and child cognitive skills.

108x58mm (300 x 300 DPI)

Review only



Figure 2. Hypothesized cross-lagged path model predicting child health and parental stress from baseline to 24-months follow-up.

102x68mm (300 x 300 DPI)

Review only

**STROBE 2007 (v4) Statement—Checklist of items that should be included in reports of cohort studies**

| Section/Topic             | Item # | Recommendation                                                                                                                                                                       | Reported on page # |
|---------------------------|--------|--------------------------------------------------------------------------------------------------------------------------------------------------------------------------------------|--------------------|
| Title and abstract        | 1      | (a) Indicate the study’s design with a commonly used term in the title or the abstract                                                                                               | 2                  |
|                           |        | (b) Provide in the abstract an informative and balanced summary of what was done and what was found                                                                                  | 2                  |
| <b>Introduction</b>       |        |                                                                                                                                                                                      |                    |
| Background/rationale      | 2      | Explain the scientific background and rationale for the investigation being reported                                                                                                 | 4-8                |
| Objectives                | 3      | State specific objectives, including any prespecified hypotheses                                                                                                                     | 8                  |
| <b>Methods</b>            |        |                                                                                                                                                                                      |                    |
| Study design              | 4      | Present key elements of study design early in the paper                                                                                                                              | 8                  |
| Setting                   | 5      | Describe the setting, locations, and relevant dates, including periods of recruitment, exposure, follow-up, and data collection                                                      | 8                  |
| Participants              | 6      | (a) Give the eligibility criteria, and the sources and methods of selection of participants. Describe methods of follow-up                                                           | 9                  |
|                           |        | (b) For matched studies, give matching criteria and number of exposed and unexposed                                                                                                  | NA                 |
| Variables                 | 7      | Clearly define all outcomes, exposures, predictors, potential confounders, and effect modifiers. Give diagnostic criteria, if applicable                                             | 14                 |
| Data sources/ measurement | 8*     | For each variable of interest, give sources of data and details of methods of assessment (measurement). Describe comparability of assessment methods if there is more than one group | 11-13              |
| Bias                      | 9      | Describe any efforts to address potential sources of bias                                                                                                                            | 10-14              |
| Study size                | 10     | Explain how the study size was arrived at                                                                                                                                            | 9                  |
| Quantitative variables    | 11     | Explain how quantitative variables were handled in the analyses. If applicable, describe which groupings were chosen and why                                                         | 13-14              |
| Statistical methods       | 12     | (a) Describe all statistical methods, including those used to control for confounding                                                                                                | 13-14              |
|                           |        | (b) Describe any methods used to examine subgroups and interactions                                                                                                                  | 13-14              |
|                           |        | (c) Explain how missing data were addressed                                                                                                                                          | NA                 |
|                           |        | (d) If applicable, explain how loss to follow-up was addressed                                                                                                                       | 13-14              |
|                           |        | (e) Describe any sensitivity analyses                                                                                                                                                | NA                 |
| <b>Results</b>            |        |                                                                                                                                                                                      |                    |



|                          |     |                                                                                                                                                                                                              |       |
|--------------------------|-----|--------------------------------------------------------------------------------------------------------------------------------------------------------------------------------------------------------------|-------|
| Participants             | 13* | (a) Report numbers of individuals at each stage of study—eg numbers potentially eligible, examined for eligibility, confirmed eligible, included in the study, completing follow-up, and analysed            | NA    |
|                          |     | (b) Give reasons for non-participation at each stage                                                                                                                                                         | NA    |
|                          |     | (c) Consider use of a flow diagram                                                                                                                                                                           | NA    |
| Descriptive data         | 14* | (a) Give characteristics of study participants (eg demographic, clinical, social) and information on exposures and potential confounders                                                                     | NA    |
|                          |     | (b) Indicate number of participants with missing data for each variable of interest                                                                                                                          | NA    |
|                          |     | (c) Summarise follow-up time (eg, average and total amount)                                                                                                                                                  | NA    |
| Outcome data             | 15* | Report numbers of outcome events or summary measures over time                                                                                                                                               | NA    |
| Main results             | 16  | (a) Give unadjusted estimates and, if applicable, confounder-adjusted estimates and their precision (eg, 95% confidence interval). Make clear which confounders were adjusted for and why they were included | NA    |
|                          |     | (b) Report category boundaries when continuous variables were categorized                                                                                                                                    | NA    |
|                          |     | (c) If relevant, consider translating estimates of relative risk into absolute risk for a meaningful time period                                                                                             | NA    |
| Other analyses           | 17  | Report other analyses done—eg analyses of subgroups and interactions, and sensitivity analyses                                                                                                               | 13-14 |
| <b>Discussion</b>        |     |                                                                                                                                                                                                              |       |
| Key results              | 18  | Summarise key results with reference to study objectives                                                                                                                                                     | 14-16 |
| <b>Limitations</b>       |     |                                                                                                                                                                                                              |       |
| Interpretation           | 20  | Give a cautious overall interpretation of results considering objectives, limitations, multiplicity of analyses, results from similar studies, and other relevant evidence                                   | 14-16 |
| Generalisability         | 21  | Discuss the generalisability (external validity) of the study results                                                                                                                                        | 14-16 |
| <b>Other information</b> |     |                                                                                                                                                                                                              |       |
| Funding                  | 22  | Give the source of funding and the role of the funders for the present study and, if applicable, for the original study on which the present article is based                                                | 21    |

\*Give information separately for cases and controls in case-control studies and, if applicable, for exposed and unexposed groups in cohort and cross-sectional studies.

**Note:** An Explanation and Elaboration article discusses each checklist item and gives methodological background and published examples of transparent reporting. The STROBE checklist is best used in conjunction with this article (freely available on the Web sites of PLoS Medicine at <http://www.plosmedicine.org/>, Annals of Internal Medicine at <http://www.annals.org/>, and Epidemiology at <http://www.epidem.com/>). Information on the STROBE Initiative is available at [www.strobe-statement.org](http://www.strobe-statement.org).
